# Supplementary material for: The hidden burden of infertility: multimorbidity patterns and longitudinal disease trajectories in a population-based cohort of 2 million women
Source: Research Square preprint supplement (doi:10.21203/rs.3.rs-7308896/v1), 2025-09-09
Supplement: Supplementary file 1 [file 0aae12b12afe60441d91a54d.docx]

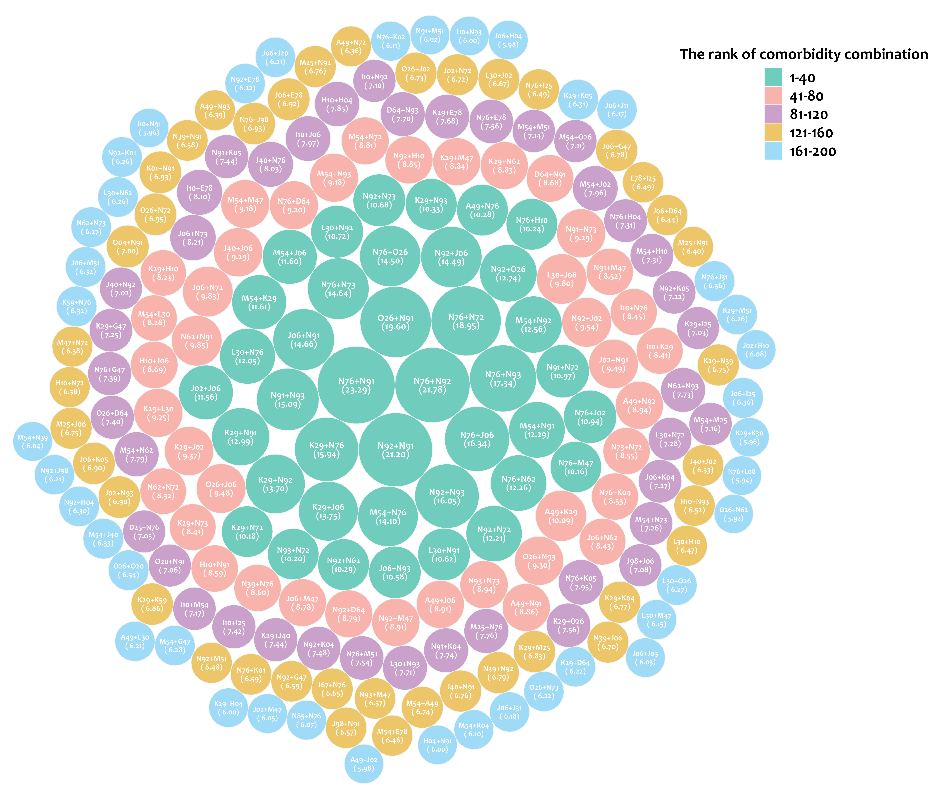


**Supplement Figure 1. The 200 most prevalent binary combinations**

**
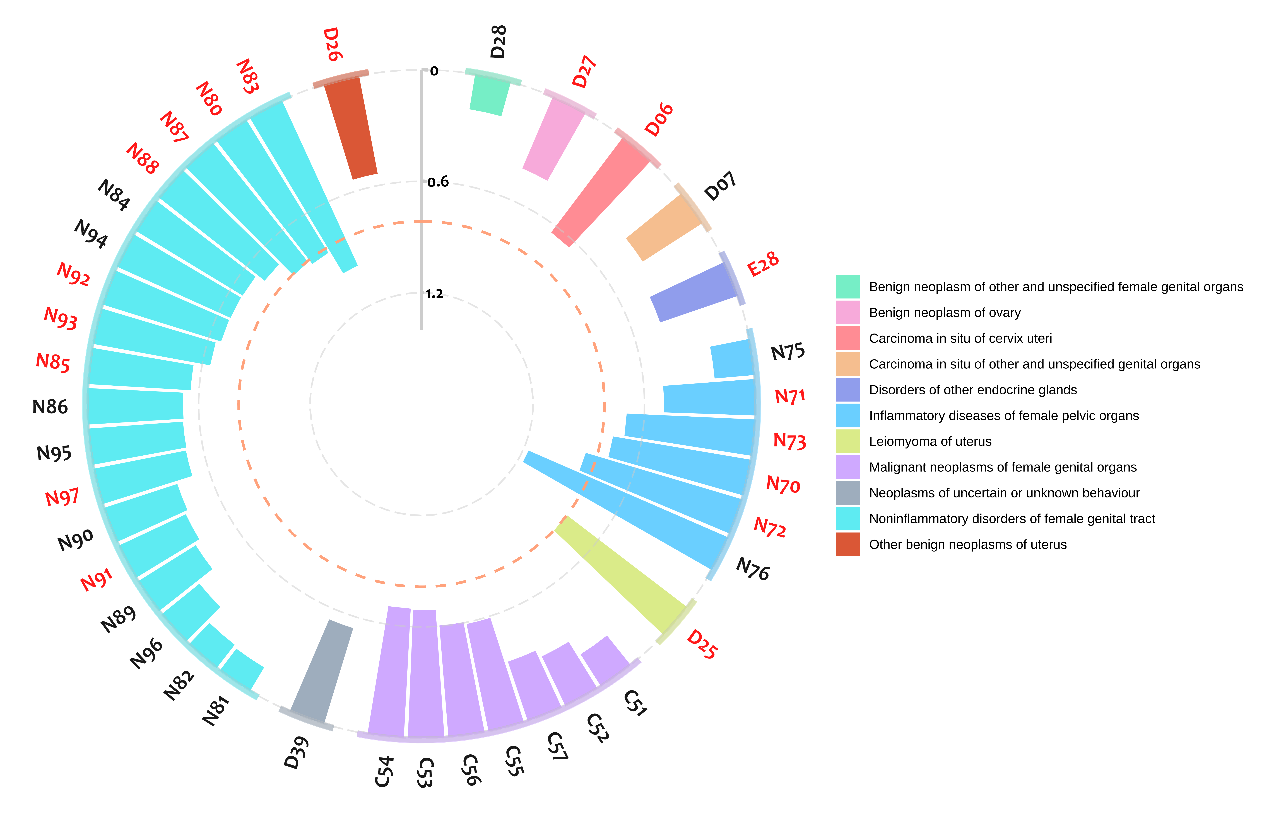
**

**Supplement Figure 2. Multimorbidity coefficient for the 39 gynecological diseases**


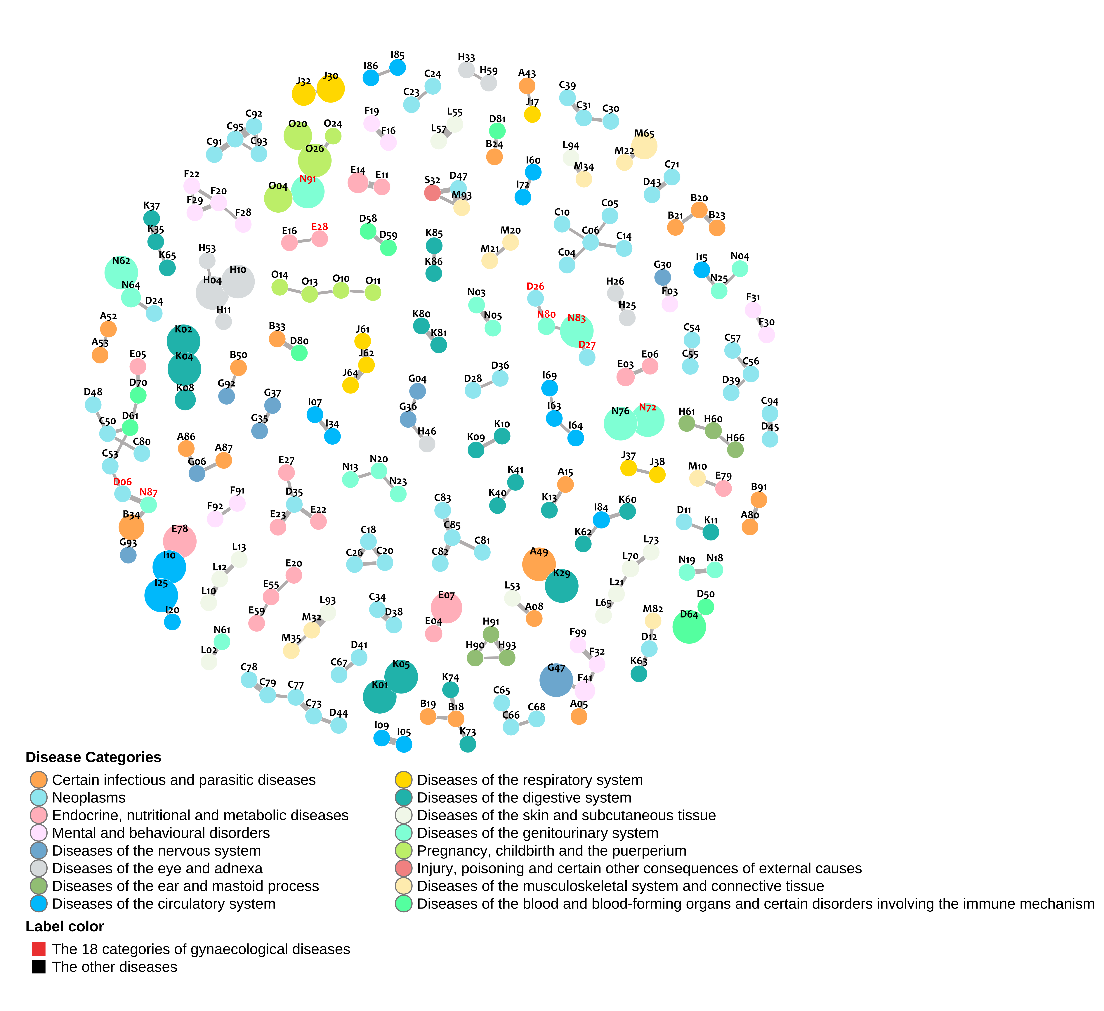


**Supplement Figure 3. Multimorbidity networks with partial correlations >0.15 for all diseases**


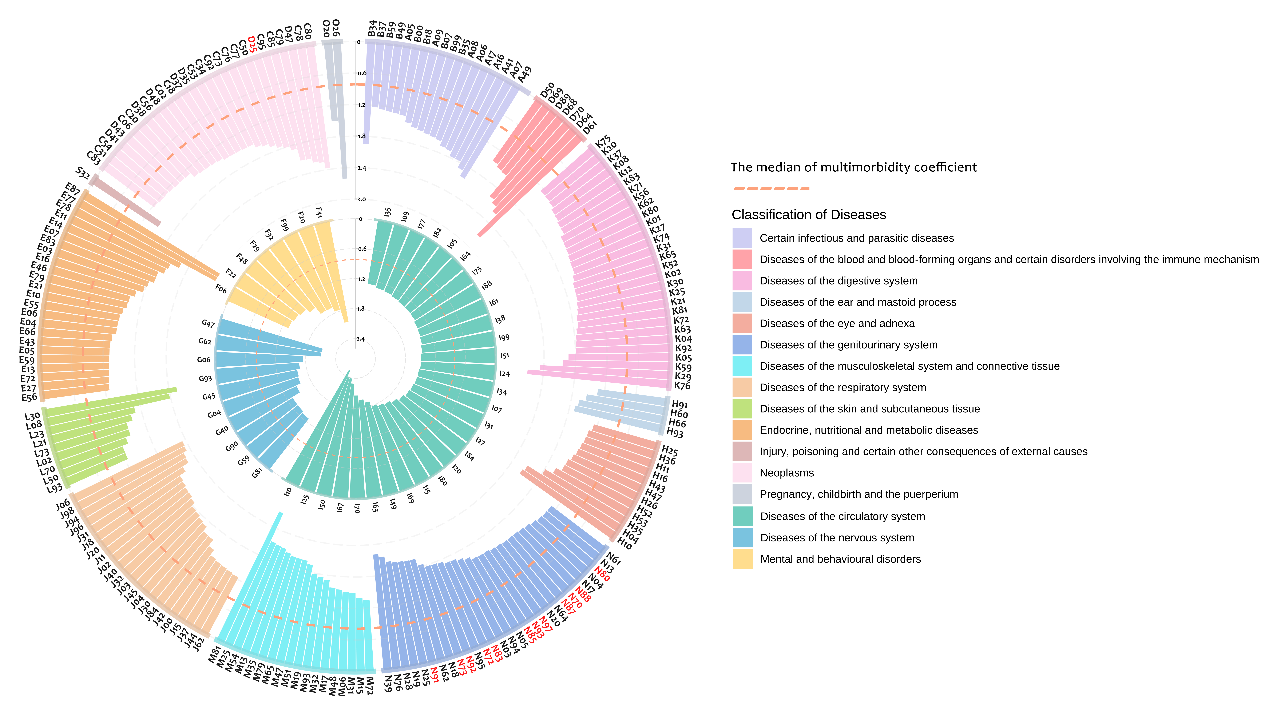


**Supplement Figure 4. Multimorbidity coefficient for the top 250 diseases**
