# Supplementary material for: The hidden burden of infertility: multimorbidity patterns and longitudinal disease trajectories in a population-based cohort of 2 million women
Source: Research Square preprint supplement (doi:10.21203/rs.3.rs-7308896/v1), 2025-09-09
Supplement: Supplementary file 2 [file b93a5106d238a621f5b3d108.docx]

# **Supplement Table 1. Distribution of the 18 infertility and infertility-related gynecological diseases**

| **Diagnoses (ICD-10 code)** | **Patient count (n)** | **Visit count (n)** |
| --- | --- | --- |
| Ovarian dysfunction (E28) | 69411 | 211799 |
| Salpingitis and oophoritis (N70) | 112171 | 172819 |
| Inflammatory disease of uterus, except cervix (N71) | 68058 | 93139 |
| Inflammatory disease of cervix uteri (N72) | 557737 | 1134086 |
| Other female pelvic inflammatory diseases (N73) | 457583 | 837422 |
| Endometriosis (N80) | 108278 | 419855 |
| Noninflammatory disorders of ovary, fallopian tube and broad ligament (N83) | 228013 | 454438 |
| Other noninflammatory disorders of uterus, except cervix (N85) | 233882 | 415724 |
| Dysplasia of cervix uteri (N87) | 69032 | 183029 |
| Other noninflammatory disorders of cervix uteri (N88) | 145839 | 238072 |
| Absent, scanty and rare menstruation (N91) | 979767 | 2668968 |
| Excessive, frequent and irregular menstruation (N92) | 860679 | 3046442 |
| Other abnormal uterine and vaginal bleeding (N93) | 661930 | 1333123 |
| Female infertility (N97) | 135472 | 1624406 |
| Leiomyoma of uterus (D25) | 301676 | 784870 |
| Other benign neoplasms of uterus (D26) | 41009 | 58178 |
| Benign neoplasm of ovary (D27) | 25065 | 27881 |
| Carcinoma in situ of cervix uteri (D06) | 20745 | 53250 |

# **Supplement Table 2. 200 most prevalent binary combinations of multimorbidity**

| **ID** | **combination** | **patients** | **frequent(95%CI)** | **ID** | **combination** | **patients** | **frequent(95%CI)** |
| --- | --- | --- | --- | --- | --- | --- | --- |
| 1 | N76+N91 | 480811 | 23.29(23.23, 23.35) | 101 | I10+I25 | 153200 | 7.42(7.39, 7.46) |
| 2 | N76+N92 | 449730 | 21.78(21.73, 21.84) | 102 | O26+D64 | 152730 | 7.40(7.36, 7.43) |
| 3 | N92+N91 | 437726 | 21.20(21.15, 21.26) | 103 | N76+G47 | 152663 | 7.40(7.36, 7.43) |
| 4 | O26+N91 | 404619 | 19.60(19.55, 19.65) | 104 | N76+H04 | 150831 | 7.31(7.27, 7.34) |
| 5 | N76+N72 | 391304 | 18.95(18.90, 19.01) | 105 | M54+H10 | 150823 | 7.31(7.27, 7.34) |
| 6 | N76+N93 | 357896 | 17.34(17.28, 17.39) | 106 | L30+N72 | 150247 | 7.28(7.24, 7.31) |
| 7 | N76+J06 | 337248 | 16.34(16.29, 16.39) | 107 | J06+K04 | 149996 | 7.27(7.23, 7.30) |
| 8 | N92+N93 | 331249 | 16.05(16.00, 16.10) | 108 | M54+N73 | 149833 | 7.26(7.22, 7.29) |
| 9 | K29+N76 | 329027 | 15.94(15.89, 15.99) | 109 | K29+G47 | 149657 | 7.25(7.21, 7.29) |
| 10 | N91+N93 | 311519 | 15.09(15.04, 15.14) | 110 | N92+K05 | 148994 | 7.22(7.18, 7.25) |
| 11 | J06+N91 | 302608 | 14.66(14.61, 14.71) | 111 | I10+M54 | 148035 | 7.17(7.14, 7.21) |
| 12 | N76+N73 | 302249 | 14.64(14.59, 14.69) | 112 | M54+M25 | 147797 | 7.16(7.12, 7.19) |
| 13 | N76+O26 | 299332 | 14.50(14.45, 14.55) | 113 | M54+M51 | 147428 | 7.14(7.11, 7.18) |
| 14 | N92+J06 | 299088 | 14.49(14.44, 14.54) | 114 | M54+O26 | 146856 | 7.11(7.08, 7.15) |
| 15 | M54+N76 | 291137 | 14.10(14.06, 14.15) | 115 | I10+N92 | 146659 | 7.10(7.07, 7.14) |
| 16 | K29+J06 | 283780 | 13.75(13.70, 13.79) | 116 | J98+J06 | 146181 | 7.08(7.05, 7.12) |
| 17 | K29+N92 | 282824 | 13.70(13.65, 13.75) | 117 | O20+N91 | 145828 | 7.06(7.03, 7.10) |
| 18 | K29+N91 | 268207 | 12.99(12.95, 13.04) | 118 | D25+N76 | 145609 | 7.05(7.02, 7.09) |
| 19 | N92+O26 | 262922 | 12.74(12.69, 12.78) | 119 | K29+I25 | 145129 | 7.03(7.00, 7.07) |
| 20 | M54+N92 | 259279 | 12.56(12.51, 12.60) | 120 | J40+N92 | 144904 | 7.02(6.98, 7.05) |
| 21 | M54+N91 | 253679 | 12.29(12.24, 12.33) | 121 | O04+N91 | 144527 | 7.00(6.97, 7.04) |
| 22 | N76+N62 | 253053 | 12.26(12.21, 12.30) | 122 | O26+N72 | 143569 | 6.95(6.92, 6.99) |
| 23 | N92+N72 | 252132 | 12.21(12.17, 12.26) | 123 | K01+N91 | 143108 | 6.93(6.90, 6.97) |
| 24 | L30+N76 | 248711 | 12.05(12.00, 12.09) | 124 | N76+J98 | 142973 | 6.93(6.89, 6.96) |
| 25 | M54+K29 | 239618 | 11.61(11.56, 11.65) | 125 | J06+E78 | 142922 | 6.92(6.89, 6.96) |
| 26 | M54+J06 | 239379 | 11.60(11.55, 11.64) | 126 | J02+N93 | 142518 | 6.90(6.87, 6.94) |
| 27 | J02+J06 | 238697 | 11.56(11.52, 11.61) | 127 | J06+K05 | 142478 | 6.90(6.87, 6.94) |
| 28 | N91+N72 | 226380 | 10.97(10.92, 11.01) | 128 | K29+K59 | 141593 | 6.86(6.82, 6.89) |
| 29 | N76+J02 | 225787 | 10.94(10.89, 10.98) | 129 | K29+M25 | 141097 | 6.83(6.80, 6.87) |
| 30 | L30+N92 | 221276 | 10.72(10.68, 10.76) | 130 | N39+N92 | 140083 | 6.79(6.75, 6.82) |
| 31 | N92+N73 | 220453 | 10.68(10.64, 10.72) | 131 | J06+G47 | 140063 | 6.78(6.75, 6.82) |
| 32 | L30+N91 | 219231 | 10.62(10.58, 10.66) | 132 | K29+K04 | 139833 | 6.77(6.74, 6.81) |
| 33 | J06+N93 | 218409 | 10.58(10.54, 10.62) | 133 | M25+N92 | 139649 | 6.76(6.73, 6.80) |
| 34 | K29+N93 | 213189 | 10.33(10.29, 10.37) | 134 | J40+N91 | 139484 | 6.76(6.72, 6.79) |
| 35 | N92+N62 | 212469 | 10.29(10.25, 10.33) | 135 | K29+N39 | 139407 | 6.75(6.72, 6.79) |
| 36 | A49+N76 | 212166 | 10.28(10.24, 10.32) | 136 | M25+J06 | 139400 | 6.75(6.72, 6.79) |
| 37 | N76+H10 | 211417 | 10.24(10.20, 10.28) | 137 | M54+A49 | 139174 | 6.74(6.71, 6.78) |
| 38 | N93+N72 | 210475 | 10.20(10.15, 10.24) | 138 | O26+J02 | 139014 | 6.73(6.70, 6.77) |
| 39 | K29+N72 | 210234 | 10.18(10.14, 10.23) | 139 | J02+N72 | 138811 | 6.72(6.69, 6.76) |
| 40 | N76+M47 | 209724 | 10.16(10.12, 10.20) | 140 | N39+J06 | 138281 | 6.70(6.66, 6.73) |
| 41 | A49+K29 | 208205 | 10.09(10.04, 10.13) | 141 | L30+J02 | 137686 | 6.67(6.64, 6.70) |
| 42 | N62+N91 | 203275 | 9.85(9.81, 9.89) | 142 | I67+N76 | 137238 | 6.65(6.61, 6.68) |
| 43 | J06+N72 | 202881 | 9.83(9.79, 9.87) | 143 | N92+G47 | 136116 | 6.59(6.56, 6.63) |
| 44 | L30+J06 | 202255 | 9.80(9.76, 9.84) | 144 | N76+K01 | 136017 | 6.59(6.56, 6.62) |
| 45 | N92+J02 | 197027 | 9.54(9.50, 9.58) | 145 | N39+N91 | 135806 | 6.58(6.54, 6.61) |
| 46 | J02+N91 | 195959 | 9.49(9.45, 9.53) | 146 | N93+M47 | 135727 | 6.57(6.54, 6.61) |
| 47 | O26+J06 | 195723 | 9.48(9.44, 9.52) | 147 | J98+N91 | 135651 | 6.57(6.54, 6.61) |
| 48 | K29+J02 | 193474 | 9.37(9.33, 9.41) | 148 | J40+J02 | 134893 | 6.53(6.50, 6.57) |
| 49 | O26+N93 | 192014 | 9.30(9.26, 9.34) | 149 | H10+N93 | 134592 | 6.52(6.49, 6.55) |
| 50 | J40+J06 | 191712 | 9.29(9.25, 9.33) | 150 | N76+I25 | 133982 | 6.49(6.46, 6.52) |
| 51 | N91+N73 | 191690 | 9.29(9.25, 9.33) | 151 | E78+I25 | 133936 | 6.49(6.45, 6.52) |
| 52 | K29+L30 | 190968 | 9.25(9.21, 9.29) | 152 | N92+M51 | 133871 | 6.48(6.45, 6.52) |
| 53 | N76+D64 | 189956 | 9.20(9.16, 9.24) | 153 | L30+H10 | 133560 | 6.47(6.44, 6.50) |
| 54 | M54+N93 | 189521 | 9.18(9.14, 9.22) | 154 | M54+E78 | 133317 | 6.46(6.42, 6.49) |
| 55 | M54+M47 | 189477 | 9.18(9.14, 9.22) | 155 | J06+D64 | 132933 | 6.44(6.41, 6.47) |
| 56 | A49+N92 | 184609 | 8.94(8.90, 8.98) | 156 | M25+N91 | 132223 | 6.41(6.37, 6.44) |
| 57 | N93+N73 | 184475 | 8.94(8.90, 8.98) | 157 | A49+N93 | 131848 | 6.39(6.35, 6.42) |
| 58 | A49+J06 | 184032 | 8.91(8.88, 8.95) | 158 | H10+N72 | 131785 | 6.38(6.35, 6.42) |
| 59 | N92+M47 | 183855 | 8.91(8.87, 8.95) | 159 | M47+N72 | 131780 | 6.38(6.35, 6.42) |
| 60 | A49+N91 | 182859 | 8.86(8.82, 8.90) | 160 | A49+N72 | 131342 | 6.36(6.33, 6.40) |
| 61 | N92+H10 | 182769 | 8.85(8.81, 8.89) | 161 | N76+J31 | 131329 | 6.36(6.33, 6.40) |
| 62 | K29+M47 | 182601 | 8.85(8.81, 8.88) | 162 | J06+I25 | 131201 | 6.36(6.32, 6.39) |
| 63 | K29+N62 | 182386 | 8.83(8.80, 8.87) | 163 | O26+O20 | 130844 | 6.34(6.31, 6.37) |
| 64 | M54+N72 | 181976 | 8.82(8.78, 8.85) | 164 | M54+J40 | 130703 | 6.33(6.30, 6.36) |
| 65 | N92+D64 | 181508 | 8.79(8.75, 8.83) | 165 | K59+N76 | 130441 | 6.32(6.29, 6.35) |
| 66 | J06+M47 | 181218 | 8.78(8.74, 8.82) | 166 | J06+M51 | 130375 | 6.32(6.28, 6.35) |
| 67 | H10+J06 | 179396 | 8.69(8.65, 8.73) | 167 | K29+K05 | 130178 | 6.31(6.27, 6.34) |
| 68 | D64+N91 | 179127 | 8.68(8.64, 8.72) | 168 | N92+H04 | 130062 | 6.30(6.27, 6.33) |
| 69 | N39+N76 | 177562 | 8.60(8.56, 8.64) | 169 | M54+G47 | 129743 | 6.29(6.25, 6.32) |
| 70 | H10+N91 | 177409 | 8.59(8.56, 8.63) | 170 | N62+N73 | 129543 | 6.28(6.24, 6.31) |
| 71 | N73+N72 | 176570 | 8.55(8.52, 8.59) | 171 | L30+O26 | 129461 | 6.27(6.24, 6.30) |
| 72 | N76+K04 | 176074 | 8.53(8.49, 8.57) | 172 | L30+N62 | 129311 | 6.26(6.23, 6.30) |
| 73 | N91+M47 | 175986 | 8.52(8.49, 8.56) | 173 | N92+K01 | 129249 | 6.26(6.23, 6.29) |
| 74 | I10+N76 | 174484 | 8.45(8.41, 8.49) | 174 | K29+M51 | 129209 | 6.26(6.23, 6.29) |
| 75 | J06+N62 | 174050 | 8.43(8.39, 8.47) | 175 | K29+D64 | 128427 | 6.22(6.19, 6.25) |
| 76 | I10+K29 | 173696 | 8.41(8.38, 8.45) | 176 | O26+N73 | 128340 | 6.22(6.18, 6.25) |
| 77 | K29+N73 | 173640 | 8.41(8.37, 8.45) | 177 | N92+E78 | 128317 | 6.22(6.18, 6.25) |
| 78 | N62+N72 | 171689 | 8.32(8.28, 8.35) | 178 | J06+J20 | 128262 | 6.21(6.18, 6.25) |
| 79 | M54+L30 | 170972 | 8.28(8.24, 8.32) | 179 | N92+J98 | 128241 | 6.21(6.18, 6.25) |
| 80 | K29+H10 | 169883 | 8.23(8.19, 8.27) | 180 | A49+L30 | 128216 | 6.21(6.18, 6.24) |
| 81 | J06+N73 | 169583 | 8.21(8.18, 8.25) | 181 | J06+J31 | 127564 | 6.18(6.15, 6.21) |
| 82 | I10+E78 | 167199 | 8.10(8.06, 8.14) | 182 | J06+J11 | 127443 | 6.17(6.14, 6.21) |
| 83 | J40+N76 | 165852 | 8.03(8.00, 8.07) | 183 | L30+M47 | 127006 | 6.15(6.12, 6.19) |
| 84 | I10+J06 | 164499 | 7.97(7.93, 8.01) | 184 | N76+K02 | 126149 | 6.11(6.08, 6.14) |
| 85 | M54+J02 | 164314 | 7.96(7.92, 8.00) | 185 | M54+K04 | 125936 | 6.10(6.07, 6.13) |
| 86 | N76+K05 | 164220 | 7.96(7.92, 7.99) | 186 | J02+H10 | 125532 | 6.08(6.05, 6.11) |
| 87 | H10+H04 | 162104 | 7.85(7.82, 7.89) | 187 | N85+N76 | 125413 | 6.08(6.04, 6.11) |
| 88 | M54+N62 | 160826 | 7.79(7.75, 7.83) | 188 | J02+M47 | 124810 | 6.05(6.01, 6.08) |
| 89 | M25+N76 | 160121 | 7.76(7.72, 7.79) | 189 | M54+N39 | 124644 | 6.04(6.01, 6.07) |
| 90 | N91+K04 | 159725 | 7.74(7.70, 7.77) | 190 | J06+J03 | 124457 | 6.03(6.00, 6.06) |
| 91 | N62+N93 | 159669 | 7.73(7.70, 7.77) | 191 | N91+M51 | 124297 | 6.02(5.99, 6.05) |
| 92 | L30+N93 | 159186 | 7.71(7.67, 7.75) | 192 | I10+N93 | 123928 | 6.00(5.97, 6.04) |
| 93 | D64+N93 | 158957 | 7.70(7.66, 7.74) | 193 | H04+N91 | 123827 | 6.00(5.97, 6.03) |
| 94 | K29+E78 | 158523 | 7.68(7.64, 7.72) | 194 | K29+H04 | 123818 | 6.00(5.97, 6.03) |
| 95 | K29+O26 | 156054 | 7.56(7.52, 7.60) | 195 | A49+J02 | 123540 | 5.98(5.95, 6.02) |
| 96 | N76+E78 | 156036 | 7.56(7.52, 7.59) | 196 | J06+H04 | 123360 | 5.98(5.94, 6.01) |
| 97 | N76+M51 | 155675 | 7.54(7.51, 7.58) | 197 | I10+N91 | 123129 | 5.96(5.93, 6.00) |
| 98 | N92+K04 | 154416 | 7.48(7.44, 7.52) | 198 | K29+K30 | 122991 | 5.96(5.93, 5.99) |
| 99 | K29+J40 | 153691 | 7.45(7.41, 7.48) | 199 | N76+L08 | 122699 | 5.94(5.91, 5.98) |
| 100 | N91+K05 | 153555 | 7.44(7.40, 7.47) | 200 | O26+N62 | 122302 | 5.92(5.89, 5.96) |

# **Supplement Table 3. The partial correlation for 39 gynecological diseases (ρ in descending order, red indicates ρ ≥ 0.05)**

| **ID** | **D1** | **D2** | **ρ** | **ID** | **D1** | **D2** | **ρ** | **ID** | **D1** | **D2** | **ρ** |
| --- | --- | --- | --- | --- | --- | --- | --- | --- | --- | --- | --- |
| 1 | D06 | N87 | 0.316 | 110 | E28 | N93 | 0.024 | 219 | D25 | N75 | 0.010 |
| 2 | C54 | C55 | 0.300 | 111 | N87 | N95 | 0.024 | 220 | N75 | N85 | 0.010 |
| 3 | N72 | N76 | 0.251 | 112 | N71 | N86 | 0.024 | 221 | N71 | N88 | 0.010 |
| 4 | D27 | N83 | 0.215 | 113 | C53 | D07 | 0.024 | 222 | C54 | C57 | 0.009 |
| 5 | C56 | C57 | 0.214 | 114 | N72 | N94 | 0.024 | 223 | N87 | N90 | 0.009 |
| 6 | D26 | N80 | 0.197 | 115 | D27 | D28 | 0.024 | 224 | D25 | D39 | 0.009 |
| 7 | C56 | D39 | 0.191 | 116 | D26 | N94 | 0.024 | 225 | N83 | N88 | 0.009 |
| 8 | N73 | N76 | 0.176 | 117 | N73 | N92 | 0.023 | 226 | N81 | N88 | 0.009 |
| 9 | N80 | N83 | 0.175 | 118 | N75 | N76 | 0.023 | 227 | N85 | N92 | 0.009 |
| 10 | C53 | D06 | 0.172 | 119 | C52 | D07 | 0.022 | 228 | D25 | N72 | 0.009 |
| 11 | N87 | N88 | 0.166 | 120 | N80 | N85 | 0.022 | 229 | N73 | N75 | 0.009 |
| 12 | D25 | D26 | 0.161 | 121 | C54 | N93 | 0.022 | 230 | N85 | N88 | 0.009 |
| 13 | C53 | C55 | 0.141 | 122 | N72 | N90 | 0.022 | 231 | N71 | N87 | 0.009 |
| 14 | N75 | N90 | 0.131 | 123 | N86 | N91 | 0.022 | 232 | D26 | N85 | 0.009 |
| 15 | N80 | N94 | 0.127 | 124 | N93 | N94 | 0.022 | 233 | D26 | D39 | 0.009 |
| 16 | N72 | N87 | 0.120 | 125 | N76 | N87 | 0.022 | 234 | E28 | N83 | 0.008 |
| 17 | N76 | N91 | 0.120 | 126 | N76 | N81 | 0.021 | 235 | D28 | N70 | 0.008 |
| 18 | E28 | N92 | 0.118 | 127 | N84 | N92 | 0.021 | 236 | N88 | N93 | 0.008 |
| 19 | E28 | N97 | 0.118 | 128 | C53 | C57 | 0.021 | 237 | N71 | N83 | 0.008 |
| 20 | D27 | D39 | 0.107 | 129 | C55 | N82 | 0.021 | 238 | D25 | N86 | 0.008 |
| 21 | D25 | N80 | 0.107 | 130 | N71 | N72 | 0.020 | 239 | N86 | N95 | 0.008 |
| 22 | N92 | N94 | 0.107 | 131 | C54 | D25 | 0.020 | 240 | N83 | N92 | 0.008 |
| 23 | C54 | D07 | 0.104 | 132 | N88 | N89 | 0.020 | 241 | N81 | N90 | 0.008 |
| 24 | N72 | N86 | 0.102 | 133 | N80 | N84 | 0.020 | 242 | N76 | N96 | 0.008 |
| 25 | N96 | N97 | 0.099 | 134 | N70 | N94 | 0.020 | 243 | D39 | N72 | 0.008 |
| 26 | N71 | N93 | 0.098 | 135 | N90 | N95 | 0.020 | 244 | D26 | D28 | 0.008 |
| 27 | C51 | C52 | 0.097 | 136 | N92 | N96 | 0.020 | 245 | C56 | D07 | 0.008 |
| 28 | N84 | N85 | 0.087 | 137 | D28 | N89 | 0.019 | 246 | N81 | N91 | 0.008 |
| 29 | D25 | N84 | 0.085 | 138 | C55 | D07 | 0.019 | 247 | D06 | N72 | 0.008 |
| 30 | N85 | N93 | 0.085 | 139 | N93 | N96 | 0.019 | 248 | N80 | N97 | 0.007 |
| 31 | N84 | N88 | 0.084 | 140 | E28 | N71 | 0.019 | 249 | N75 | N89 | 0.007 |
| 32 | D25 | N83 | 0.084 | 141 | N89 | N95 | 0.019 | 250 | N81 | N82 | 0.007 |
| 33 | N92 | N93 | 0.082 | 142 | D28 | N90 | 0.018 | 251 | C54 | N84 | 0.007 |
| 34 | N76 | N92 | 0.081 | 143 | C53 | N89 | 0.018 | 252 | D39 | N82 | 0.007 |
| 35 | N70 | N73 | 0.080 | 144 | N71 | N95 | 0.018 | 253 | C55 | D25 | 0.007 |
| 36 | N70 | N83 | 0.077 | 145 | D25 | N88 | 0.018 | 254 | N73 | N96 | 0.007 |
| 37 | N86 | N87 | 0.076 | 146 | N86 | N92 | 0.018 | 255 | N90 | N94 | 0.007 |
| 38 | D06 | N88 | 0.075 | 147 | D39 | N80 | 0.018 | 256 | D39 | N73 | 0.007 |
| 39 | N72 | N88 | 0.075 | 148 | N84 | N90 | 0.018 | 257 | C54 | D27 | 0.007 |
| 40 | N76 | N93 | 0.073 | 149 | N83 | N84 | 0.018 | 258 | C56 | N94 | 0.007 |
| 41 | D25 | N95 | 0.073 | 150 | C55 | D39 | 0.017 | 259 | N85 | N97 | 0.007 |
| 42 | D07 | N89 | 0.069 | 151 | N71 | N73 | 0.017 | 260 | D39 | N90 | 0.007 |
| 43 | N72 | N84 | 0.068 | 152 | N76 | N97 | 0.017 | 261 | D06 | N70 | 0.007 |
| 44 | N76 | N86 | 0.066 | 153 | N70 | N95 | 0.017 | 262 | N81 | N84 | 0.006 |
| 45 | N84 | N93 | 0.065 | 154 | D25 | N94 | 0.017 | 263 | C54 | N71 | 0.006 |
| 46 | N71 | N85 | 0.063 | 155 | D25 | N73 | 0.016 | 264 | D28 | D39 | 0.006 |
| 47 | N92 | N97 | 0.062 | 156 | N86 | N90 | 0.016 | 265 | C53 | D26 | 0.006 |
| 48 | N76 | N88 | 0.062 | 157 | C53 | C56 | 0.016 | 266 | N88 | N96 | 0.006 |
| 49 | D39 | N83 | 0.060 | 158 | N93 | N95 | 0.016 | 267 | N94 | N96 | 0.006 |
| 50 | N73 | N80 | 0.058 | 159 | D07 | N90 | 0.016 | 268 | D39 | N84 | 0.006 |
| 51 | E28 | N91 | 0.058 | 160 | N73 | N95 | 0.015 | 269 | E28 | N96 | 0.006 |
| 52 | N83 | N94 | 0.058 | 161 | N85 | N96 | 0.015 | 270 | N90 | N92 | 0.006 |
| 53 | N73 | N94 | 0.057 | 162 | D26 | N83 | 0.015 | 271 | C53 | N93 | 0.006 |
| 54 | N73 | N83 | 0.055 | 163 | N76 | N89 | 0.015 | 272 | C57 | D28 | 0.006 |
| 55 | N91 | N94 | 0.054 | 164 | N84 | N86 | 0.015 | 273 | C51 | C53 | 0.006 |
| 56 | C54 | C56 | 0.053 | 165 | N85 | N86 | 0.015 | 274 | N81 | N93 | 0.006 |
| 57 | N76 | N90 | 0.053 | 166 | N86 | N93 | 0.015 | 275 | C54 | N83 | 0.006 |
| 58 | C53 | N88 | 0.052 | 167 | N73 | N97 | 0.015 | 276 | C57 | N82 | 0.005 |
| 59 | N70 | N80 | 0.050 | 168 | N72 | N93 | 0.015 | 277 | D26 | D27 | 0.005 |
| 60 | C52 | C53 | 0.050 | 169 | N70 | N96 | 0.015 | 278 | N73 | N81 | 0.005 |
| 61 | N70 | N97 | 0.050 | 170 | C53 | N95 | 0.015 | 279 | D06 | D25 | 0.005 |
| 62 | C53 | N82 | 0.049 | 171 | N73 | N85 | 0.015 | 280 | D06 | N89 | 0.005 |
| 63 | N70 | N76 | 0.049 | 172 | D07 | N87 | 0.014 | 281 | N70 | N87 | 0.005 |
| 64 | N72 | N73 | 0.048 | 173 | N88 | N94 | 0.014 | 282 | D06 | D26 | 0.005 |
| 65 | D25 | N70 | 0.048 | 174 | N73 | N84 | 0.014 | 283 | D25 | N89 | 0.005 |
| 66 | D28 | N83 | 0.047 | 175 | N86 | N89 | 0.014 | 284 | N73 | N86 | 0.005 |
| 67 | C51 | D07 | 0.047 | 176 | N72 | N81 | 0.014 | 285 | N87 | N97 | 0.005 |
| 68 | N70 | N86 | 0.046 | 177 | N83 | N95 | 0.014 | 286 | D27 | E28 | 0.005 |
| 69 | C53 | C54 | 0.045 | 178 | D25 | N81 | 0.013 | 287 | D25 | N96 | 0.005 |
| 70 | N73 | N93 | 0.045 | 179 | C52 | C55 | 0.013 | 288 | D26 | N81 | 0.004 |
| 71 | D25 | N85 | 0.044 | 180 | C55 | D26 | 0.013 | 289 | C57 | N83 | 0.004 |
| 72 | N86 | N88 | 0.044 | 181 | N85 | N95 | 0.013 | 290 | D25 | N90 | 0.004 |
| 73 | N71 | N92 | 0.044 | 182 | N71 | N76 | 0.013 | 291 | N75 | N84 | 0.004 |
| 74 | C53 | D39 | 0.043 | 183 | N85 | N94 | 0.013 | 292 | D27 | N73 | 0.004 |
| 75 | N70 | N92 | 0.041 | 184 | D07 | N95 | 0.013 | 293 | D28 | N84 | 0.004 |
| 76 | N91 | N96 | 0.039 | 185 | N84 | N97 | 0.013 | 294 | N82 | N89 | 0.004 |
| 77 | N94 | N97 | 0.038 | 186 | N71 | N96 | 0.013 | 295 | N90 | N91 | 0.004 |
| 78 | C54 | N85 | 0.037 | 187 | D26 | N84 | 0.013 | 296 | D39 | N89 | 0.004 |
| 79 | N71 | N84 | 0.037 | 188 | D39 | N70 | 0.012 | 297 | N70 | N88 | 0.004 |
| 80 | N87 | N89 | 0.037 | 189 | N81 | N95 | 0.012 | 298 | C51 | C55 | 0.004 |
| 81 | E28 | N95 | 0.036 | 190 | N80 | N95 | 0.012 | 299 | N80 | N81 | 0.004 |
| 82 | N89 | N90 | 0.036 | 191 | N83 | N97 | 0.012 | 300 | E28 | N72 | 0.004 |
| 83 | C56 | N83 | 0.036 | 192 | D26 | N95 | 0.012 | 301 | C57 | D07 | 0.004 |
| 84 | N70 | N72 | 0.036 | 193 | C53 | N70 | 0.012 | 302 | N76 | N83 | 0.004 |
| 85 | N88 | N95 | 0.035 | 194 | N80 | N93 | 0.012 | 303 | D39 | E28 | 0.004 |
| 86 | N70 | N71 | 0.035 | 195 | C54 | N80 | 0.012 | 304 | D07 | N88 | 0.004 |
| 87 | D06 | D07 | 0.035 | 196 | N70 | N84 | 0.011 | 305 | D26 | N82 | 0.004 |
| 88 | N72 | N95 | 0.034 | 197 | D25 | D27 | 0.011 | 306 | N80 | N89 | 0.004 |
| 89 | N76 | N95 | 0.034 | 198 | N70 | N93 | 0.011 | 307 | D27 | N80 | 0.003 |
| 90 | N84 | N95 | 0.033 | 199 | C56 | N70 | 0.011 | 308 | D06 | D27 | 0.003 |
| 91 | C55 | C56 | 0.033 | 200 | N72 | N89 | 0.011 | 309 | N75 | N95 | 0.003 |
| 92 | C52 | N89 | 0.032 | 201 | N71 | N94 | 0.011 | 310 | C56 | D27 | 0.003 |
| 93 | N71 | N97 | 0.031 | 202 | N81 | N89 | 0.011 | 311 | C52 | D28 | 0.003 |
| 94 | C52 | C57 | 0.031 | 203 | D25 | N71 | 0.011 | 312 | N85 | N89 | 0.003 |
| 95 | N83 | N85 | 0.030 | 204 | C52 | D39 | 0.011 | 313 | N83 | N90 | 0.003 |
| 96 | N91 | N97 | 0.030 | 205 | N84 | N89 | 0.011 | 314 | C57 | D25 | 0.003 |
| 97 | C52 | N82 | 0.028 | 206 | N83 | N86 | 0.011 | 315 | N75 | N88 | 0.003 |
| 98 | D26 | N70 | 0.028 | 207 | C55 | C57 | 0.011 | 316 | C54 | D28 | 0.003 |
| 99 | D27 | N70 | 0.027 | 208 | E28 | N73 | 0.010 | 317 | N70 | N81 | 0.003 |
| 100 | N76 | N85 | 0.027 | 209 | C53 | N87 | 0.010 | 318 | N80 | N87 | 0.003 |
| 101 | C51 | N90 | 0.026 | 210 | N83 | N93 | 0.010 | 319 | C57 | D39 | 0.003 |
| 102 | N91 | N92 | 0.026 | 211 | N70 | N91 | 0.010 | 320 | N71 | N80 | 0.003 |
| 103 | C54 | N95 | 0.025 | 212 | C56 | D25 | 0.010 | 321 | N75 | N80 | 0.003 |
| 104 | C54 | N70 | 0.025 | 213 | N86 | N94 | 0.010 | 322 | D06 | N76 | 0.003 |
| 105 | N85 | N91 | 0.025 | 214 | C54 | D26 | 0.010 | 323 | C56 | N89 | 0.003 |
| 106 | N76 | N84 | 0.025 | 215 | C51 | C57 | 0.010 | 324 | N81 | N92 | 0.003 |
| 107 | E28 | N94 | 0.025 | 216 | C56 | N82 | 0.010 | 325 | E28 | N88 | 0.003 |
| 108 | D25 | D28 | 0.025 | 217 | N88 | N90 | 0.010 |  |  |  |  |
| 109 | N76 | N94 | 0.025 | 218 | N70 | N85 | 0.010 |  |  |  |  |

**Supplement Table 4. MMC for 39 gynecological diseases**

| **ID** | **ICD-10** | **MMC** | **number_of_connections** | **averge_MMC** |
| --- | --- | --- | --- | --- |
| 1 | N76 | 1.172 | 27 | 0.043 |
| 2 | N83 | 0.979 | 31 | 0.032 |
| 3 | N72 | 0.878 | 25 | 0.035 |
| 4 | N80 | 0.843 | 24 | 0.035 |
| 5 | N87 | 0.823 | 21 | 0.039 |
| 6 | D25 | 0.815 | 31 | 0.026 |
| 7 | N70 | 0.755 | 33 | 0.023 |
| 8 | N88 | 0.725 | 25 | 0.029 |
| 9 | C54 | 0.697 | 20 | 0.035 |
| 10 | N73 | 0.695 | 29 | 0.024 |
| 11 | C53 | 0.688 | 21 | 0.033 |
| 12 | N84 | 0.674 | 28 | 0.024 |
| 13 | N94 | 0.671 | 27 | 0.025 |
| 14 | N92 | 0.670 | 18 | 0.037 |
| 15 | N93 | 0.643 | 29 | 0.022 |
| 16 | D06 | 0.642 | 18 | 0.036 |
| 17 | C56 | 0.604 | 21 | 0.029 |
| 18 | C55 | 0.591 | 21 | 0.028 |
| 19 | N85 | 0.555 | 25 | 0.022 |
| 20 | D39 | 0.538 | 26 | 0.021 |
| 21 | D26 | 0.537 | 30 | 0.018 |
| 22 | N86 | 0.516 | 22 | 0.023 |
| 23 | N95 | 0.513 | 28 | 0.018 |
| 24 | N97 | 0.507 | 18 | 0.028 |
| 25 | N71 | 0.496 | 24 | 0.021 |
| 26 | E28 | 0.443 | 21 | 0.021 |
| 27 | D27 | 0.420 | 16 | 0.026 |
| 28 | N90 | 0.417 | 25 | 0.017 |
| 29 | N91 | 0.399 | 13 | 0.031 |
| 30 | D07 | 0.384 | 20 | 0.019 |
| 31 | N89 | 0.366 | 33 | 0.011 |
| 32 | C57 | 0.337 | 23 | 0.015 |
| 33 | C52 | 0.295 | 17 | 0.017 |
| 34 | N96 | 0.262 | 21 | 0.012 |
| 35 | N75 | 0.217 | 22 | 0.010 |
| 36 | C51 | 0.204 | 20 | 0.010 |
| 37 | D28 | 0.192 | 25 | 0.008 |
| 38 | N82 | 0.160 | 26 | 0.006 |
| 39 | N81 | 0.148 | 26 | 0.006 |

# **Supplement Table 5.The partial correlations≥0.15 for all diseases (ρ in descending order)**

| **ID** | **D1** | **D2** | **ρ** | **ID** | **D1** | **D2** | **ρ** |
| --- | --- | --- | --- | --- | --- | --- | --- |
| 1 | D47 | M93 | 0.851 | 79 | A05 | F41 | 0.195 |
| 2 | C92 | C95 | 0.512 | 80 | D12 | M82 | 0.194 |
| 3 | L93 | M32 | 0.497 | 81 | O20 | O26 | 0.194 |
| 4 | L55 | L57 | 0.472 | 82 | H04 | H11 | 0.193 |
| 5 | J61 | J62 | 0.403 | 83 | D24 | N64 | 0.192 |
| 6 | E11 | E14 | 0.383 | 84 | C30 | C31 | 0.192 |
| 7 | I05 | I09 | 0.381 | 85 | D12 | K63 | 0.191 |
| 8 | C34 | D38 | 0.358 | 86 | O24 | O26 | 0.191 |
| 9 | C83 | C85 | 0.346 | 87 | C66 | C68 | 0.189 |
| 10 | J62 | J64 | 0.343 | 88 | D26 | N80 | 0.189 |
| 11 | K35 | K37 | 0.338 | 89 | F91 | F92 | 0.188 |
| 12 | C78 | C79 | 0.332 | 90 | E79 | M10 | 0.187 |
| 13 | C91 | C95 | 0.317 | 91 | I10 | I25 | 0.184 |
| 14 | D06 | N87 | 0.292 | 92 | D70 | E05 | 0.184 |
| 15 | K80 | K81 | 0.291 | 93 | C06 | C14 | 0.183 |
| 16 | F32 | F99 | 0.288 | 94 | C56 | C57 | 0.183 |
| 17 | C54 | C55 | 0.288 | 95 | F30 | F31 | 0.182 |
| 18 | C65 | C66 | 0.287 | 96 | M20 | M21 | 0.182 |
| 19 | C94 | D45 | 0.286 | 97 | I84 | K62 | 0.182 |
| 20 | D35 | E23 | 0.281 | 98 | E04 | E07 | 0.182 |
| 21 | D47 | S32 | 0.281 | 99 | J37 | J38 | 0.181 |
| 22 | L21 | L65 | 0.281 | 100 | B18 | K73 | 0.181 |
| 23 | L10 | L12 | 0.279 | 101 | G36 | H46 | 0.180 |
| 24 | B33 | D80 | 0.275 | 102 | C56 | D39 | 0.179 |
| 25 | C82 | C85 | 0.274 | 103 | H60 | H66 | 0.179 |
| 26 | B20 | B23 | 0.274 | 104 | K85 | K86 | 0.178 |
| 27 | H04 | H10 | 0.271 | 105 | N20 | N23 | 0.178 |
| 28 | C73 | C77 | 0.270 | 106 | M93 | S32 | 0.177 |
| 29 | F16 | F19 | 0.267 | 107 | N62 | N64 | 0.177 |
| 30 | N18 | N19 | 0.262 | 108 | N13 | N20 | 0.177 |
| 31 | H91 | H93 | 0.257 | 109 | D11 | K11 | 0.175 |
| 32 | L94 | M34 | 0.254 | 110 | C77 | C79 | 0.175 |
| 33 | C71 | D43 | 0.248 | 111 | I85 | I86 | 0.175 |
| 34 | F20 | F29 | 0.247 | 112 | D61 | D70 | 0.174 |
| 35 | A08 | L53 | 0.243 | 113 | H60 | H61 | 0.174 |
| 36 | C18 | C26 | 0.242 | 114 | C50 | D48 | 0.174 |
| 37 | M22 | M65 | 0.241 | 115 | D35 | E27 | 0.174 |
| 38 | A80 | B91 | 0.239 | 116 | G04 | G36 | 0.174 |
| 39 | N03 | N05 | 0.238 | 117 | C50 | C80 | 0.174 |
| 40 | C31 | C39 | 0.237 | 118 | J30 | J32 | 0.172 |
| 41 | B18 | K74 | 0.237 | 119 | K35 | K65 | 0.171 |
| 42 | K02 | K04 | 0.236 | 120 | K04 | K08 | 0.171 |
| 43 | D35 | E22 | 0.235 | 121 | E55 | E59 | 0.168 |
| 44 | H25 | H26 | 0.234 | 122 | O13 | O14 | 0.168 |
| 45 | D50 | D64 | 0.231 | 123 | D28 | D36 | 0.168 |
| 46 | D58 | D59 | 0.231 | 124 | C04 | C06 | 0.166 |
| 47 | C92 | C93 | 0.231 | 125 | A52 | A53 | 0.166 |
| 48 | F03 | G30 | 0.230 | 126 | E16 | E28 | 0.166 |
| 49 | C18 | C20 | 0.229 | 127 | I63 | I64 | 0.165 |
| 50 | F41 | G47 | 0.229 | 128 | N80 | N83 | 0.165 |
| 51 | L70 | L73 | 0.227 | 129 | C53 | D06 | 0.164 |
| 52 | L12 | L13 | 0.227 | 130 | O10 | O13 | 0.164 |
| 53 | B34 | N87 | 0.226 | 131 | C23 | C24 | 0.162 |
| 54 | I84 | K60 | 0.225 | 132 | K01 | K05 | 0.161 |
| 55 | I07 | I34 | 0.225 | 133 | N91 | O04 | 0.160 |
| 56 | E03 | E06 | 0.223 | 134 | A43 | J17 | 0.158 |
| 57 | A86 | G06 | 0.219 | 135 | M32 | M35 | 0.158 |
| 58 | C67 | D41 | 0.219 | 136 | H33 | H59 | 0.158 |
| 59 | C73 | D44 | 0.218 | 137 | L21 | L70 | 0.158 |
| 60 | L02 | N61 | 0.214 | 138 | F22 | F29 | 0.157 |
| 61 | B24 | D81 | 0.213 | 139 | B34 | G93 | 0.156 |
| 62 | D27 | N83 | 0.213 | 140 | C93 | C95 | 0.156 |
| 63 | K09 | K10 | 0.211 | 141 | A49 | K29 | 0.156 |
| 64 | G35 | G37 | 0.209 | 142 | H04 | H53 | 0.156 |
| 65 | C20 | C26 | 0.208 | 143 | C06 | C10 | 0.155 |
| 66 | N72 | N76 | 0.207 | 144 | H90 | H91 | 0.155 |
| 67 | F32 | F41 | 0.206 | 145 | C05 | C06 | 0.154 |
| 68 | B20 | B21 | 0.205 | 146 | N04 | N25 | 0.153 |
| 69 | A87 | G06 | 0.204 | 147 | C53 | D61 | 0.153 |
| 70 | A15 | K13 | 0.204 | 148 | N91 | O26 | 0.153 |
| 71 | I15 | N25 | 0.199 | 149 | O10 | O11 | 0.152 |
| 72 | I20 | I25 | 0.198 | 150 | K40 | K41 | 0.152 |
| 73 | F20 | F22 | 0.198 | 151 | H90 | H93 | 0.152 |
| 74 | C81 | C85 | 0.197 | 152 | B50 | G92 | 0.151 |
| 75 | C50 | D61 | 0.197 | 153 | I63 | I69 | 0.151 |
| 76 | B18 | B19 | 0.196 | 154 | E20 | E55 | 0.150 |
| 77 | E78 | I10 | 0.196 | 155 | F20 | F28 | 0.150 |
| 78 | I60 | I72 | 0.195 |  |  |  |  |

# **Supplement Table 6. Top 250 MMC for all diseases**

| ID | ICD-10 | MMC | number_of_connections | averge_MMC |
| --- | --- | --- | --- | --- |
| 1 | E87 | 2.990 | 622 | 0.005 |
| 2 | E77 | 2.972 | 531 | 0.006 |
| 3 | D61 | 2.716 | 441 | 0.006 |
| 4 | M81 | 2.714 | 535 | 0.005 |
| 5 | K76 | 2.703 | 595 | 0.005 |
| 6 | O26 | 2.604 | 434 | 0.006 |
| 7 | L30 | 2.546 | 549 | 0.005 |
| 8 | I10 | 2.540 | 514 | 0.005 |
| 9 | K29 | 2.470 | 534 | 0.005 |
| 10 | I25 | 2.411 | 508 | 0.005 |
| 11 | I50 | 2.392 | 532 | 0.004 |
| 12 | L08 | 2.385 | 530 | 0.004 |
| 13 | C80 | 2.371 | 503 | 0.005 |
| 14 | J06 | 2.336 | 543 | 0.004 |
| 15 | J98 | 2.324 | 552 | 0.004 |
| 16 | I67 | 2.295 | 466 | 0.005 |
| 17 | J94 | 2.251 | 468 | 0.005 |
| 18 | C78 | 2.248 | 422 | 0.005 |
| 19 | E78 | 2.244 | 507 | 0.004 |
| 20 | J96 | 2.237 | 424 | 0.005 |
| 21 | D47 | 2.220 | 441 | 0.005 |
| 22 | N39 | 2.211 | 597 | 0.004 |
| 23 | D64 | 2.192 | 554 | 0.004 |
| 24 | H10 | 2.152 | 531 | 0.004 |
| 25 | N76 | 2.150 | 510 | 0.004 |
| 26 | M25 | 2.137 | 553 | 0.004 |
| 27 | C79 | 2.136 | 425 | 0.005 |
| 28 | C85 | 2.126 | 440 | 0.005 |
| 29 | M54 | 2.118 | 495 | 0.004 |
| 30 | G47 | 2.113 | 514 | 0.004 |
| 31 | H04 | 2.111 | 505 | 0.004 |
| 32 | G62 | 2.105 | 512 | 0.004 |
| 33 | M13 | 2.105 | 485 | 0.004 |
| 34 | J31 | 2.099 | 549 | 0.004 |
| 35 | D70 | 2.080 | 517 | 0.004 |
| 36 | E11 | 2.066 | 478 | 0.004 |
| 37 | I70 | 2.058 | 501 | 0.004 |
| 38 | M35 | 2.050 | 469 | 0.004 |
| 39 | F41 | 2.050 | 514 | 0.004 |
| 40 | N28 | 2.042 | 532 | 0.004 |
| 41 | K59 | 2.042 | 560 | 0.004 |
| 42 | E14 | 2.031 | 478 | 0.004 |
| 43 | A49 | 2.021 | 540 | 0.004 |
| 44 | M79 | 2.013 | 574 | 0.004 |
| 45 | N19 | 2.013 | 434 | 0.005 |
| 46 | D68 | 2.009 | 532 | 0.004 |
| 47 | M65 | 2.008 | 543 | 0.004 |
| 48 | M47 | 2.005 | 461 | 0.004 |
| 49 | N25 | 2.000 | 395 | 0.005 |
| 50 | N91 | 1.984 | 470 | 0.004 |
| 51 | N62 | 1.980 | 482 | 0.004 |
| 52 | I63 | 1.967 | 470 | 0.004 |
| 53 | J18 | 1.963 | 579 | 0.003 |
| 54 | B34 | 1.946 | 474 | 0.004 |
| 55 | M51 | 1.946 | 510 | 0.004 |
| 56 | J20 | 1.942 | 481 | 0.004 |
| 57 | K05 | 1.933 | 518 | 0.004 |
| 58 | E07 | 1.920 | 509 | 0.004 |
| 59 | E83 | 1.919 | 467 | 0.004 |
| 60 | J11 | 1.913 | 438 | 0.004 |
| 61 | J02 | 1.908 | 484 | 0.004 |
| 62 | A07 | 1.902 | 459 | 0.004 |
| 63 | I49 | 1.897 | 546 | 0.003 |
| 64 | C95 | 1.888 | 372 | 0.005 |
| 65 | J40 | 1.865 | 495 | 0.004 |
| 66 | N18 | 1.841 | 430 | 0.004 |
| 67 | E03 | 1.823 | 524 | 0.003 |
| 68 | D25 | 1.807 | 517 | 0.003 |
| 69 | I69 | 1.787 | 476 | 0.004 |
| 70 | H35 | 1.787 | 519 | 0.003 |
| 71 | M19 | 1.785 | 491 | 0.004 |
| 72 | K92 | 1.785 | 559 | 0.003 |
| 73 | K04 | 1.780 | 528 | 0.003 |
| 74 | J32 | 1.780 | 531 | 0.003 |
| 75 | E16 | 1.778 | 454 | 0.004 |
| 76 | A41 | 1.777 | 429 | 0.004 |
| 77 | A16 | 1.776 | 464 | 0.004 |
| 78 | N73 | 1.776 | 478 | 0.004 |
| 79 | F20 | 1.772 | 430 | 0.004 |
| 80 | K63 | 1.770 | 475 | 0.004 |
| 81 | N92 | 1.766 | 475 | 0.004 |
| 82 | J03 | 1.764 | 458 | 0.004 |
| 83 | C50 | 1.759 | 382 | 0.005 |
| 84 | K72 | 1.751 | 531 | 0.003 |
| 85 | N95 | 1.750 | 478 | 0.004 |
| 86 | M93 | 1.748 | 474 | 0.004 |
| 87 | G06 | 1.747 | 416 | 0.004 |
| 88 | I15 | 1.746 | 411 | 0.004 |
| 89 | J45 | 1.728 | 478 | 0.004 |
| 90 | I80 | 1.711 | 532 | 0.003 |
| 91 | K81 | 1.710 | 467 | 0.004 |
| 92 | K21 | 1.709 | 503 | 0.003 |
| 93 | M32 | 1.708 | 356 | 0.005 |
| 94 | H93 | 1.702 | 514 | 0.003 |
| 95 | N72 | 1.700 | 507 | 0.003 |
| 96 | J04 | 1.699 | 472 | 0.004 |
| 97 | C77 | 1.696 | 450 | 0.004 |
| 98 | N83 | 1.693 | 525 | 0.003 |
| 99 | A17 | 1.684 | 438 | 0.004 |
| 100 | L23 | 1.683 | 530 | 0.003 |
| 101 | F99 | 1.678 | 497 | 0.003 |
| 102 | K25 | 1.672 | 457 | 0.004 |
| 103 | F32 | 1.669 | 524 | 0.003 |
| 104 | G93 | 1.667 | 476 | 0.004 |
| 105 | A06 | 1.667 | 439 | 0.004 |
| 106 | K30 | 1.653 | 451 | 0.004 |
| 107 | I20 | 1.652 | 423 | 0.004 |
| 108 | E46 | 1.652 | 491 | 0.003 |
| 109 | H66 | 1.650 | 489 | 0.003 |
| 110 | N03 | 1.649 | 436 | 0.004 |
| 111 | K02 | 1.629 | 474 | 0.003 |
| 112 | C76 | 1.627 | 448 | 0.004 |
| 113 | K52 | 1.627 | 521 | 0.003 |
| 114 | H53 | 1.624 | 508 | 0.003 |
| 115 | K65 | 1.620 | 435 | 0.004 |
| 116 | G45 | 1.609 | 447 | 0.004 |
| 117 | N94 | 1.598 | 510 | 0.003 |
| 118 | I84 | 1.595 | 548 | 0.003 |
| 119 | C73 | 1.593 | 437 | 0.004 |
| 120 | G04 | 1.592 | 404 | 0.004 |
| 121 | J30 | 1.590 | 478 | 0.003 |
| 122 | L21 | 1.588 | 458 | 0.003 |
| 123 | J84 | 1.584 | 461 | 0.003 |
| 124 | A08 | 1.582 | 447 | 0.004 |
| 125 | K31 | 1.580 | 517 | 0.003 |
| 126 | M17 | 1.576 | 489 | 0.003 |
| 127 | E79 | 1.563 | 513 | 0.003 |
| 128 | B35 | 1.560 | 517 | 0.003 |
| 129 | I27 | 1.552 | 428 | 0.004 |
| 130 | M48 | 1.550 | 507 | 0.003 |
| 131 | E21 | 1.548 | 445 | 0.003 |
| 132 | B99 | 1.544 | 518 | 0.003 |
| 133 | N05 | 1.538 | 439 | 0.004 |
| 134 | I31 | 1.534 | 451 | 0.003 |
| 135 | K74 | 1.532 | 399 | 0.004 |
| 136 | K27 | 1.527 | 506 | 0.003 |
| 137 | H60 | 1.527 | 533 | 0.003 |
| 138 | N85 | 1.524 | 479 | 0.003 |
| 139 | N93 | 1.523 | 519 | 0.003 |
| 140 | B07 | 1.520 | 489 | 0.003 |
| 141 | C92 | 1.516 | 440 | 0.003 |
| 142 | C34 | 1.514 | 444 | 0.003 |
| 143 | I07 | 1.514 | 466 | 0.003 |
| 144 | K01 | 1.511 | 472 | 0.003 |
| 145 | I34 | 1.509 | 438 | 0.003 |
| 146 | D89 | 1.509 | 470 | 0.003 |
| 147 | S32 | 1.508 | 440 | 0.003 |
| 148 | M06 | 1.506 | 478 | 0.003 |
| 149 | C53 | 1.506 | 397 | 0.004 |
| 150 | D35 | 1.504 | 444 | 0.003 |
| 151 | H52 | 1.503 | 540 | 0.003 |
| 152 | F29 | 1.502 | 456 | 0.003 |
| 153 | M31 | 1.500 | 416 | 0.004 |
| 154 | D37 | 1.499 | 440 | 0.003 |
| 155 | G40 | 1.496 | 471 | 0.003 |
| 156 | O20 | 1.496 | 455 | 0.003 |
| 157 | N97 | 1.494 | 358 | 0.004 |
| 158 | H26 | 1.493 | 472 | 0.003 |
| 159 | A09 | 1.493 | 481 | 0.003 |
| 160 | E10 | 1.492 | 435 | 0.003 |
| 161 | K80 | 1.491 | 479 | 0.003 |
| 162 | D69 | 1.490 | 527 | 0.003 |
| 163 | I24 | 1.488 | 482 | 0.003 |
| 164 | N20 | 1.485 | 520 | 0.003 |
| 165 | I51 | 1.484 | 490 | 0.003 |
| 166 | K62 | 1.478 | 508 | 0.003 |
| 167 | K56 | 1.469 | 466 | 0.003 |
| 168 | L73 | 1.469 | 500 | 0.003 |
| 169 | L02 | 1.467 | 486 | 0.003 |
| 170 | N64 | 1.465 | 462 | 0.003 |
| 171 | C18 | 1.461 | 408 | 0.004 |
| 172 | N87 | 1.461 | 464 | 0.003 |
| 173 | I99 | 1.460 | 408 | 0.004 |
| 174 | E55 | 1.452 | 422 | 0.003 |
| 175 | N70 | 1.451 | 466 | 0.003 |
| 176 | C02 | 1.445 | 434 | 0.003 |
| 177 | J42 | 1.440 | 451 | 0.003 |
| 178 | I38 | 1.439 | 437 | 0.003 |
| 179 | D50 | 1.439 | 479 | 0.003 |
| 180 | H47 | 1.436 | 451 | 0.003 |
| 181 | E06 | 1.436 | 474 | 0.003 |
| 182 | D48 | 1.434 | 510 | 0.003 |
| 183 | B18 | 1.434 | 410 | 0.003 |
| 184 | N88 | 1.429 | 501 | 0.003 |
| 185 | E04 | 1.429 | 474 | 0.003 |
| 186 | C56 | 1.427 | 396 | 0.004 |
| 187 | I61 | 1.427 | 397 | 0.004 |
| 188 | I88 | 1.415 | 495 | 0.003 |
| 189 | D38 | 1.406 | 454 | 0.003 |
| 190 | N17 | 1.402 | 384 | 0.004 |
| 191 | M15 | 1.401 | 395 | 0.004 |
| 192 | F48 | 1.401 | 461 | 0.003 |
| 193 | H43 | 1.395 | 507 | 0.003 |
| 194 | K71 | 1.383 | 450 | 0.003 |
| 195 | I73 | 1.383 | 458 | 0.003 |
| 196 | I64 | 1.377 | 451 | 0.003 |
| 197 | K83 | 1.377 | 462 | 0.003 |
| 198 | I05 | 1.373 | 439 | 0.003 |
| 199 | H16 | 1.373 | 520 | 0.003 |
| 200 | L70 | 1.368 | 460 | 0.003 |
| 201 | N04 | 1.366 | 378 | 0.004 |
| 202 | F22 | 1.358 | 445 | 0.003 |
| 203 | I82 | 1.357 | 457 | 0.003 |
| 204 | M72 | 1.356 | 502 | 0.003 |
| 205 | E66 | 1.356 | 445 | 0.003 |
| 206 | H11 | 1.346 | 526 | 0.003 |
| 207 | K12 | 1.344 | 545 | 0.002 |
| 208 | I77 | 1.336 | 450 | 0.003 |
| 209 | E43 | 1.332 | 422 | 0.003 |
| 210 | H91 | 1.331 | 518 | 0.003 |
| 211 | H36 | 1.331 | 397 | 0.003 |
| 212 | K08 | 1.330 | 508 | 0.003 |
| 213 | N80 | 1.327 | 417 | 0.003 |
| 214 | I09 | 1.324 | 412 | 0.003 |
| 215 | F06 | 1.324 | 450 | 0.003 |
| 216 | J00 | 1.321 | 486 | 0.003 |
| 217 | E05 | 1.321 | 465 | 0.003 |
| 218 | B00 | 1.316 | 539 | 0.002 |
| 219 | G90 | 1.315 | 484 | 0.003 |
| 220 | G59 | 1.311 | 420 | 0.003 |
| 221 | N13 | 1.310 | 442 | 0.003 |
| 222 | E59 | 1.306 | 425 | 0.003 |
| 223 | E13 | 1.306 | 448 | 0.003 |
| 224 | C20 | 1.306 | 386 | 0.003 |
| 225 | N61 | 1.303 | 428 | 0.003 |
| 226 | A05 | 1.300 | 458 | 0.003 |
| 227 | E72 | 1.299 | 413 | 0.003 |
| 228 | C06 | 1.297 | 340 | 0.004 |
| 229 | J15 | 1.292 | 486 | 0.003 |
| 230 | D43 | 1.291 | 426 | 0.003 |
| 231 | E27 | 1.288 | 468 | 0.003 |
| 232 | B49 | 1.286 | 472 | 0.003 |
| 233 | I35 | 1.283 | 436 | 0.003 |
| 234 | E56 | 1.279 | 430 | 0.003 |
| 235 | J37 | 1.278 | 465 | 0.003 |
| 236 | K37 | 1.276 | 454 | 0.003 |
| 237 | G81 | 1.274 | 445 | 0.003 |
| 238 | D41 | 1.274 | 406 | 0.003 |
| 239 | H25 | 1.270 | 452 | 0.003 |
| 240 | B59 | 1.264 | 358 | 0.004 |
| 241 | K20 | 1.263 | 450 | 0.003 |
| 242 | J44 | 1.262 | 447 | 0.003 |
| 243 | C54 | 1.261 | 387 | 0.003 |
| 244 | K75 | 1.260 | 439 | 0.003 |
| 245 | C31 | 1.260 | 437 | 0.003 |
| 246 | L50 | 1.253 | 532 | 0.002 |
| 247 | L93 | 1.253 | 439 | 0.003 |
| 248 | J62 | 1.242 | 468 | 0.003 |
| 249 | B37 | 1.236 | 522 | 0.002 |
| 250 | C83 | 1.231 | 433 | 0.003 |

# **Supplement Table 7. The MMC between systemic diseases and the 18 categories of gynecological diseases**

| **ID** | **D1** | **D2** | **MMC** | **ID** | **D1** | **D2** | **MMC** |
| --- | --- | --- | --- | --- | --- | --- | --- |
| 1 | A00-B99 | D06 | 0.045 | 100 | K00-K93 | N80 | 0.064 |
| 2 | C00-D48 | D06 | 0.135 | 101 | M00-M99 | N80 | 0.006 |
| 3 | G00-G99 | D06 | 0.004 | 102 | N00-N99 | N80 | 0.298 |
| 4 | I00-I99 | D06 | 0.005 | 103 | O00-O29 | N80 | 0.004 |
| 5 | J00-J99 | D06 | 0.004 | 104 | A00-B99 | N83 | 0.040 |
| 6 | M00-M99 | D06 | 0.012 | 105 | C00-D48 | N83 | 0.193 |
| 7 | N00-N99 | D06 | 0.296 | 106 | D50-D89 | N83 | 0.017 |
| 8 | A00-B99 | D25 | 0.055 | 107 | E00-E90 | N83 | 0.005 |
| 9 | C00-D48 | D25 | 0.081 | 108 | G00-G99 | N83 | 0.004 |
| 10 | D50-D89 | D25 | 0.056 | 109 | H00-H59 | N83 | 0.007 |
| 11 | E00-E90 | D25 | 0.008 | 110 | I00-I99 | N83 | 0.011 |
| 12 | G00-G99 | D25 | 0.009 | 111 | J00-J99 | N83 | 0.037 |
| 13 | H00-H59 | D25 | 0.015 | 112 | K00-K93 | N83 | 0.082 |
| 14 | I00-I99 | D25 | 0.066 | 113 | M00-M99 | N83 | 0.014 |
| 15 | J00-J99 | D25 | 0.050 | 114 | N00-N99 | N83 | 0.203 |
| 16 | K00-K93 | D25 | 0.043 | 115 | O00-O29 | N83 | 0.050 |
| 17 | M00-M99 | D25 | 0.053 | 116 | A00-B99 | N85 | 0.032 |
| 18 | N00-N99 | D25 | 0.225 | 117 | C00-D48 | N85 | 0.029 |
| 19 | O00-O29 | D25 | 0.037 | 118 | D50-D89 | N85 | 0.069 |
| 20 | C00-D48 | D26 | 0.154 | 119 | E00-E90 | N85 | 0.018 |
| 21 | D50-D89 | D26 | 0.033 | 120 | F00-F99 | N85 | 0.008 |
| 22 | E00-E90 | D26 | 0.005 | 121 | G00-G99 | N85 | 0.009 |
| 23 | G00-G99 | D26 | 0.006 | 122 | I00-I99 | N85 | 0.020 |
| 24 | I00-I99 | D26 | 0.023 | 123 | J00-J99 | N85 | 0.046 |
| 25 | J00-J99 | D26 | 0.005 | 124 | K00-K93 | N85 | 0.023 |
| 26 | K00-K93 | D26 | 0.028 | 125 | L00-L99 | N85 | 0.005 |
| 27 | M00-M99 | D26 | 0.016 | 126 | M00-M99 | N85 | 0.029 |
| 28 | N00-N99 | D26 | 0.187 | 127 | N00-N99 | N85 | 0.211 |
| 29 | C00-D48 | D27 | 0.117 | 128 | O00-O29 | N85 | 0.192 |
| 30 | E00-E90 | D27 | 0.007 | 129 | A00-B99 | N87 | 0.216 |
| 31 | I00-I99 | D27 | 0.008 | 130 | C00-D48 | N87 | 0.114 |
| 32 | J00-J99 | D27 | 0.008 | 131 | D50-D89 | N87 | 0.039 |
| 33 | K00-K93 | D27 | 0.015 | 132 | F00-F99 | N87 | 0.007 |
| 34 | M00-M99 | D27 | 0.079 | 133 | G00-G99 | N87 | 0.019 |
| 35 | N00-N99 | D27 | 0.223 | 134 | I00-I99 | N87 | 0.007 |
| 36 | O00-O29 | D27 | 0.004 | 135 | J00-J99 | N87 | 0.025 |
| 37 | A00-B99 | E28 | 0.009 | 136 | M00-M99 | N87 | 0.007 |
| 38 | E00-E90 | E28 | 0.201 | 137 | N00-N99 | N87 | 0.216 |
| 39 | J00-J99 | E28 | 0.013 | 138 | A00-B99 | N88 | 0.093 |
| 40 | K00-K93 | E28 | 0.008 | 139 | C00-D48 | N88 | 0.024 |
| 41 | L00-L99 | E28 | 0.005 | 140 | D50-D89 | N88 | 0.013 |
| 42 | M00-M99 | E28 | 0.008 | 141 | E00-E90 | N88 | 0.010 |
| 43 | N00-N99 | E28 | 0.189 | 142 | H00-H59 | N88 | 0.004 |
| 44 | A00-B99 | N70 | 0.042 | 143 | I00-I99 | N88 | 0.026 |
| 45 | C00-D48 | N70 | 0.108 | 144 | J00-J99 | N88 | 0.046 |
| 46 | D50-D89 | N70 | 0.010 | 145 | K00-K93 | N88 | 0.040 |
| 47 | E00-E90 | N70 | 0.029 | 146 | L00-L99 | N88 | 0.004 |
| 48 | G00-G99 | N70 | 0.008 | 147 | M00-M99 | N88 | 0.016 |
| 49 | H00-H59 | N70 | 0.004 | 148 | N00-N99 | N88 | 0.218 |
| 50 | I00-I99 | N70 | 0.020 | 149 | O00-O29 | N88 | 0.029 |
| 51 | J00-J99 | N70 | 0.038 | 150 | A00-B99 | N91 | 0.089 |
| 52 | K00-K93 | N70 | 0.070 | 151 | C00-D48 | N91 | 0.005 |
| 53 | M00-M99 | N70 | 0.054 | 152 | D50-D89 | N91 | 0.014 |
| 54 | N00-N99 | N70 | 0.250 | 153 | E00-E90 | N91 | 0.077 |
| 55 | O00-O29 | N70 | 0.010 | 154 | F00-F99 | N91 | 0.006 |
| 56 | A00-B99 | N71 | 0.009 | 155 | G00-G99 | N91 | 0.015 |
| 57 | D50-D89 | N71 | 0.016 | 156 | H00-H59 | N91 | 0.021 |
| 58 | E00-E90 | N71 | 0.018 | 157 | I00-I99 | N91 | 0.005 |
| 59 | F00-F99 | N71 | 0.008 | 158 | J00-J99 | N91 | 0.095 |
| 60 | G00-G99 | N71 | 0.014 | 159 | K00-K93 | N91 | 0.095 |
| 61 | I00-I99 | N71 | 0.012 | 160 | L00-L99 | N91 | 0.025 |
| 62 | J00-J99 | N71 | 0.008 | 161 | M00-M99 | N91 | 0.037 |
| 63 | K00-K93 | N71 | 0.014 | 162 | N00-N99 | N91 | 0.105 |
| 64 | M00-M99 | N71 | 0.021 | 163 | O00-O29 | N91 | 0.134 |
| 65 | N00-N99 | N71 | 0.227 | 164 | A00-B99 | N92 | 0.078 |
| 66 | O00-O29 | N71 | 0.004 | 165 | D50-D89 | N92 | 0.022 |
| 67 | A00-B99 | N72 | 0.158 | 166 | E00-E90 | N92 | 0.087 |
| 68 | D50-D89 | N72 | 0.028 | 167 | F00-F99 | N92 | 0.010 |
| 69 | E00-E90 | N72 | 0.021 | 168 | G00-G99 | N92 | 0.015 |
| 70 | F00-F99 | N72 | 0.007 | 169 | H00-H59 | N92 | 0.019 |
| 71 | G00-G99 | N72 | 0.021 | 170 | I00-I99 | N92 | 0.009 |
| 72 | H00-H59 | N72 | 0.016 | 171 | J00-J99 | N92 | 0.119 |
| 73 | I00-I99 | N72 | 0.037 | 172 | K00-K93 | N92 | 0.088 |
| 74 | J00-J99 | N72 | 0.078 | 173 | L00-L99 | N92 | 0.024 |
| 75 | K00-K93 | N72 | 0.066 | 174 | M00-M99 | N92 | 0.046 |
| 76 | L00-L99 | N72 | 0.011 | 175 | N00-N99 | N92 | 0.161 |
| 77 | M00-M99 | N72 | 0.069 | 176 | O00-O29 | N92 | 0.060 |
| 78 | N00-N99 | N72 | 0.417 | 177 | A00-B99 | N93 | 0.059 |
| 79 | O00-O29 | N72 | 0.015 | 178 | D50-D89 | N93 | 0.042 |
| 80 | A00-B99 | N73 | 0.071 | 179 | E00-E90 | N93 | 0.038 |
| 81 | D50-D89 | N73 | 0.014 | 180 | F00-F99 | N93 | 0.007 |
| 82 | E00-E90 | N73 | 0.041 | 181 | G00-G99 | N93 | 0.005 |
| 83 | F00-F99 | N73 | 0.007 | 182 | H00-H59 | N93 | 0.019 |
| 84 | G00-G99 | N73 | 0.011 | 183 | I00-I99 | N93 | 0.020 |
| 85 | H00-H59 | N73 | 0.092 | 184 | J00-J99 | N93 | 0.089 |
| 86 | H60-H95 | N73 | 0.006 | 185 | K00-K93 | N93 | 0.061 |
| 87 | I00-I99 | N73 | 0.029 | 186 | L00-L99 | N93 | 0.013 |
| 88 | J00-J99 | N73 | 0.107 | 187 | M00-M99 | N93 | 0.037 |
| 89 | K00-K93 | N73 | 0.125 | 188 | N00-N99 | N93 | 0.166 |
| 90 | L00-L99 | N73 | 0.010 | 189 | O00-O29 | N93 | 0.151 |
| 91 | M00-M99 | N73 | 0.059 | 190 | A00-B99 | N97 | 0.047 |
| 92 | N00-N99 | N73 | 0.309 | 191 | D50-D89 | N97 | 0.011 |
| 93 | O00-O29 | N73 | 0.072 | 192 | E00-E90 | N97 | 0.159 |
| 94 | A00-B99 | N80 | 0.018 | 193 | H00-H59 | N97 | 0.004 |
| 95 | C00-D48 | N80 | 0.186 | 194 | J00-J99 | N97 | 0.023 |
| 96 | D50-D89 | N80 | 0.056 | 195 | K00-K93 | N97 | 0.036 |
| 97 | G00-G99 | N80 | 0.004 | 196 | M00-M99 | N97 | 0.004 |
| 98 | I00-I99 | N80 | 0.011 | 197 | N00-N99 | N97 | 0.138 |
| 99 | J00-J99 | N80 | 0.030 | 198 | O00-O29 | N97 | 0.083 |

# **Supplement Table 8. The MMC between the 18 categories of gynecological diseases and systemic diseases**

| **ID** | **D1** | **D2** | **MMC** | **ID** | **D1** | **D2** | **MMC** |
| --- | --- | --- | --- | --- | --- | --- | --- |
| 1 | D06 | A00-B99 | 0.049 | 122 | N80 | G00-G99 | 0.015 |
| 2 | D06 | C00-D48 | 0.256 | 123 | N80 | I00-I99 | 0.014 |
| 3 | D06 | D50-D89 | 0.010 | 124 | N80 | J00-J99 | 0.020 |
| 4 | D06 | G00-G99 | 0.030 | 125 | N80 | K00-K93 | 0.146 |
| 5 | D06 | K00-K93 | 0.005 | 126 | N80 | L00-L99 | 0.031 |
| 6 | D06 | L00-L99 | 0.012 | 127 | N80 | M00-M99 | 0.020 |
| 7 | D06 | M00-M99 | 0.037 | 128 | N80 | N00-N99 | 0.302 |
| 8 | D06 | N00-N99 | 0.154 | 129 | N80 | O00-O29 | 0.028 |
| 9 | D06 | O00-O29 | 0.011 | 130 | N83 | A00-B99 | 0.109 |
| 10 | D25 | A00-B99 | 0.127 | 131 | N83 | C00-D48 | 0.342 |
| 11 | D25 | C00-D48 | 0.228 | 132 | N83 | D50-D89 | 0.024 |
| 12 | D25 | D50-D89 | 0.092 | 133 | N83 | E00-E90 | 0.086 |
| 13 | D25 | E00-E90 | 0.077 | 134 | N83 | F00-F99 | 0.006 |
| 14 | D25 | F00-F99 | 0.007 | 135 | N83 | G00-G99 | 0.014 |
| 15 | D25 | G00-G99 | 0.017 | 136 | N83 | H00-H59 | 0.014 |
| 16 | D25 | H00-H59 | 0.025 | 137 | N83 | H60-H95 | 0.004 |
| 17 | D25 | H60-H95 | 0.009 | 138 | N83 | I00-I99 | 0.024 |
| 18 | D25 | I00-I99 | 0.052 | 139 | N83 | J00-J99 | 0.030 |
| 19 | D25 | J00-J99 | 0.024 | 140 | N83 | K00-K93 | 0.157 |
| 20 | D25 | K00-K93 | 0.138 | 141 | N83 | L00-L99 | 0.052 |
| 21 | D25 | L00-L99 | 0.050 | 142 | N83 | M00-M99 | 0.031 |
| 22 | D25 | M00-M99 | 0.118 | 143 | N83 | N00-N99 | 0.346 |
| 23 | D25 | N00-N99 | 0.359 | 144 | N83 | O00-O29 | 0.074 |
| 24 | D25 | O00-O29 | 0.043 | 145 | N85 | A00-B99 | 0.095 |
| 25 | D26 | A00-B99 | 0.031 | 146 | N85 | C00-D48 | 0.066 |
| 26 | D26 | C00-D48 | 0.054 | 147 | N85 | D50-D89 | 0.058 |
| 27 | D26 | D50-D89 | 0.032 | 148 | N85 | E00-E90 | 0.091 |
| 28 | D26 | E00-E90 | 0.043 | 149 | N85 | F00-F99 | 0.011 |
| 29 | D26 | F00-F99 | 0.005 | 150 | N85 | G00-G99 | 0.020 |
| 30 | D26 | G00-G99 | 0.012 | 151 | N85 | H00-H59 | 0.014 |
| 31 | D26 | I00-I99 | 0.031 | 152 | N85 | H60-H95 | 0.004 |
| 32 | D26 | J00-J99 | 0.004 | 153 | N85 | I00-I99 | 0.011 |
| 33 | D26 | K00-K93 | 0.089 | 154 | N85 | J00-J99 | 0.053 |
| 34 | D26 | L00-L99 | 0.034 | 155 | N85 | K00-K93 | 0.083 |
| 35 | D26 | M00-M99 | 0.036 | 156 | N85 | L00-L99 | 0.041 |
| 36 | D26 | N00-N99 | 0.198 | 157 | N85 | M00-M99 | 0.033 |
| 37 | D26 | O00-O29 | 0.015 | 158 | N85 | N00-N99 | 0.269 |
| 38 | D27 | A00-B99 | 0.016 | 159 | N85 | O00-O29 | 0.247 |
| 39 | D27 | C00-D48 | 0.106 | 160 | N87 | A00-B99 | 0.174 |
| 40 | D27 | D50-D89 | 0.009 | 161 | N87 | C00-D48 | 0.290 |
| 41 | D27 | E00-E90 | 0.029 | 162 | N87 | D50-D89 | 0.072 |
| 42 | D27 | K00-K93 | 0.047 | 163 | N87 | E00-E90 | 0.032 |
| 43 | D27 | L00-L99 | 0.004 | 164 | N87 | F00-F99 | 0.010 |
| 44 | D27 | M00-M99 | 0.089 | 165 | N87 | G00-G99 | 0.084 |
| 45 | D27 | N00-N99 | 0.118 | 166 | N87 | I00-I99 | 0.012 |
| 46 | D27 | O00-O29 | 0.017 | 167 | N87 | J00-J99 | 0.011 |
| 47 | E28 | A00-B99 | 0.046 | 168 | N87 | K00-K93 | 0.033 |
| 48 | E28 | C00-D48 | 0.009 | 169 | N87 | L00-L99 | 0.025 |
| 49 | E28 | D50-D89 | 0.022 | 170 | N87 | M00-M99 | 0.017 |
| 50 | E28 | E00-E90 | 0.344 | 171 | N87 | N00-N99 | 0.189 |
| 51 | E28 | F00-F99 | 0.010 | 172 | N87 | O00-O29 | 0.024 |
| 52 | E28 | G00-G99 | 0.004 | 173 | N88 | A00-B99 | 0.159 |
| 53 | E28 | H00-H59 | 0.004 | 174 | N88 | C00-D48 | 0.108 |
| 54 | E28 | J00-J99 | 0.035 | 175 | N88 | D50-D89 | 0.041 |
| 55 | E28 | K00-K93 | 0.040 | 176 | N88 | E00-E90 | 0.072 |
| 56 | E28 | L00-L99 | 0.037 | 177 | N88 | F00-F99 | 0.017 |
| 57 | E28 | M00-M99 | 0.013 | 178 | N88 | G00-G99 | 0.063 |
| 58 | E28 | N00-N99 | 0.134 | 179 | N88 | H00-H59 | 0.010 |
| 59 | E28 | O00-O29 | 0.059 | 180 | N88 | H60-H95 | 0.005 |
| 60 | N70 | A00-B99 | 0.112 | 181 | N88 | I00-I99 | 0.014 |
| 61 | N70 | C00-D48 | 0.090 | 182 | N88 | J00-J99 | 0.027 |
| 62 | N70 | D50-D89 | 0.019 | 183 | N88 | K00-K93 | 0.095 |
| 63 | N70 | E00-E90 | 0.051 | 184 | N88 | L00-L99 | 0.041 |
| 64 | N70 | F00-F99 | 0.010 | 185 | N88 | M00-M99 | 0.030 |
| 65 | N70 | G00-G99 | 0.005 | 186 | N88 | N00-N99 | 0.303 |
| 66 | N70 | H00-H59 | 0.012 | 187 | N88 | O00-O29 | 0.048 |
| 67 | N70 | H60-H95 | 0.004 | 188 | N91 | A00-B99 | 0.210 |
| 68 | N70 | I00-I99 | 0.032 | 189 | N91 | C00-D48 | 0.020 |
| 69 | N70 | J00-J99 | 0.018 | 190 | N91 | D50-D89 | 0.025 |
| 70 | N70 | K00-K93 | 0.126 | 191 | N91 | E00-E90 | 0.252 |
| 71 | N70 | L00-L99 | 0.043 | 192 | N91 | F00-F99 | 0.009 |
| 72 | N70 | M00-M99 | 0.063 | 193 | N91 | G00-G99 | 0.022 |
| 73 | N70 | N00-N99 | 0.239 | 194 | N91 | H00-H59 | 0.019 |
| 74 | N70 | O00-O29 | 0.080 | 195 | N91 | H60-H95 | 0.007 |
| 75 | N71 | A00-B99 | 0.038 | 196 | N91 | I00-I99 | 0.009 |
| 76 | N71 | C00-D48 | 0.023 | 197 | N91 | J00-J99 | 0.088 |
| 77 | N71 | D50-D89 | 0.019 | 198 | N91 | K00-K93 | 0.107 |
| 78 | N71 | E00-E90 | 0.088 | 199 | N91 | L00-L99 | 0.076 |
| 79 | N71 | F00-F99 | 0.006 | 200 | N91 | M00-M99 | 0.038 |
| 80 | N71 | G00-G99 | 0.009 | 201 | N91 | N00-N99 | 0.142 |
| 81 | N71 | I00-I99 | 0.008 | 202 | N91 | O00-O29 | 0.776 |
| 82 | N71 | J00-J99 | 0.010 | 203 | N92 | A00-B99 | 0.252 |
| 83 | N71 | K00-K93 | 0.031 | 204 | N92 | C00-D48 | 0.025 |
| 84 | N71 | L00-L99 | 0.020 | 205 | N92 | D50-D89 | 0.075 |
| 85 | N71 | M00-M99 | 0.019 | 206 | N92 | E00-E90 | 0.343 |
| 86 | N71 | N00-N99 | 0.171 | 207 | N92 | F00-F99 | 0.016 |
| 87 | N71 | O00-O29 | 0.040 | 208 | N92 | G00-G99 | 0.031 |
| 88 | N72 | A00-B99 | 0.303 | 209 | N92 | H00-H59 | 0.031 |
| 89 | N72 | C00-D48 | 0.017 | 210 | N92 | H60-H95 | 0.020 |
| 90 | N72 | D50-D89 | 0.058 | 211 | N92 | I00-I99 | 0.008 |
| 91 | N72 | E00-E90 | 0.121 | 212 | N92 | J00-J99 | 0.106 |
| 92 | N72 | F00-F99 | 0.005 | 213 | N92 | K00-K93 | 0.100 |
| 93 | N72 | G00-G99 | 0.035 | 214 | N92 | L00-L99 | 0.099 |
| 94 | N72 | H00-H59 | 0.016 | 215 | N92 | M00-M99 | 0.069 |
| 95 | N72 | H60-H95 | 0.011 | 216 | N92 | N00-N99 | 0.310 |
| 96 | N72 | I00-I99 | 0.030 | 217 | N92 | O00-O29 | 0.125 |
| 97 | N72 | J00-J99 | 0.079 | 218 | N93 | A00-B99 | 0.123 |
| 98 | N72 | K00-K93 | 0.099 | 219 | N93 | C00-D48 | 0.027 |
| 99 | N72 | L00-L99 | 0.083 | 220 | N93 | D50-D89 | 0.098 |
| 100 | N72 | M00-M99 | 0.093 | 221 | N93 | E00-E90 | 0.144 |
| 101 | N72 | N00-N99 | 0.482 | 222 | N93 | F00-F99 | 0.007 |
| 102 | N72 | O00-O29 | 0.068 | 223 | N93 | G00-G99 | 0.017 |
| 103 | N73 | A00-B99 | 0.194 | 224 | N93 | H00-H59 | 0.014 |
| 104 | N73 | D50-D89 | 0.015 | 225 | N93 | H60-H95 | 0.010 |
| 105 | N73 | E00-E90 | 0.120 | 226 | N93 | I00-I99 | 0.023 |
| 106 | N73 | F00-F99 | 0.020 | 227 | N93 | J00-J99 | 0.074 |
| 107 | N73 | G00-G99 | 0.024 | 228 | N93 | K00-K93 | 0.099 |
| 108 | N73 | H00-H59 | 0.020 | 229 | N93 | L00-L99 | 0.060 |
| 109 | N73 | H60-H95 | 0.019 | 230 | N93 | M00-M99 | 0.050 |
| 110 | N73 | I00-I99 | 0.037 | 231 | N93 | N00-N99 | 0.366 |
| 111 | N73 | J00-J99 | 0.094 | 232 | N93 | O00-O29 | 0.234 |
| 112 | N73 | K00-K93 | 0.214 | 233 | N97 | A00-B99 | 0.127 |
| 113 | N73 | L00-L99 | 0.090 | 234 | N97 | D50-D89 | 0.081 |
| 114 | N73 | M00-M99 | 0.111 | 235 | N97 | E00-E90 | 0.318 |
| 115 | N73 | N00-N99 | 0.310 | 236 | N97 | J00-J99 | 0.013 |
| 116 | N73 | O00-O29 | 0.130 | 237 | N97 | K00-K93 | 0.035 |
| 117 | N80 | A00-B99 | 0.046 | 238 | N97 | L00-L99 | 0.017 |
| 118 | N80 | C00-D48 | 0.204 | 239 | N97 | M00-M99 | 0.012 |
| 119 | N80 | D50-D89 | 0.056 | 240 | N97 | N00-N99 | 0.241 |
| 120 | N80 | E00-E90 | 0.031 | 241 | N97 | O00-O29 | 0.288 |
| 121 | N80 | F00-F99 | 0.006 |  |  |  |  |

# **Supplement Table 9. The IPW RR value and difference age for temporal disease trajectories of female infertility**

| **ID** | **D1** | **D2** | **IPW_RR** | **diff_age(D1-D2/年)** |
| --- | --- | --- | --- | --- |
| 1 | A74 | **N97** | 2.584 | -1.572 |
| 2 | E16 | **N97** | 1.604 | -1.837 |
| 3 | E22 | **N97** | 1.609 | -1.526 |
| 4 | E28 | **N97** | 1.815 | -1.449 |
| 5 | E46 | **N97** | 1.250 | -1.151 |
| 6 | E72 | **N97** | 1.513 | -0.619 |
| 7 | N70 | **N97** | 1.533 | -1.811 |
| 8 | N96 | **N97** | 4.217 | -0.963 |
| 9 | O02 | **N97** | 1.792 | -1.700 |
| 10 | O03 | **N97** | 1.685 | -1.836 |
| 11 | A49 | N96 | 1.109 | -1.800 |
| 12 | D25 | N96 | 1.293 | -1.320 |
| 13 | D26 | N70 | 1.332 | -1.246 |
| 14 | D27 | N70 | 2.835 | -0.578 |
| 15 | D28 | N70 | 1.501 | -1.673 |
| 16 | D35 | E22 | 42.556 | -0.614 |
| 17 | D68 | N96 | 6.738 | -0.924 |
| 18 | E02 | E16 | 1.555 | -1.219 |
| 19 | E03 | N96 | 1.890 | -1.413 |
| 20 | E03 | E16 | 1.633 | -1.440 |
| 21 | E03 | E22 | 1.554 | -1.454 |
| 22 | E03 | E28 | 1.134 | -2.084 |
| 23 | E21 | E16 | 1.652 | -1.386 |
| 24 | E23 | E22 | 19.625 | -0.799 |
| 25 | E23 | E16 | 2.016 | -1.315 |
| 26 | E23 | E28 | 1.949 | -1.452 |
| 27 | E34 | E28 | 3.213 | -0.877 |
| 28 | E34 | E22 | 1.958 | -0.940 |
| 29 | E34 | E16 | 1.460 | -1.244 |
| 30 | F99 | E22 | 1.376 | -2.329 |
| 31 | M35 | N96 | 6.380 | -0.528 |
| 32 | N60 | E22 | 1.685 | -1.049 |
| 33 | N62 | E22 | 1.072 | -2.113 |
| 34 | N64 | E22 | 1.300 | -1.593 |
| 35 | N71 | N96 | 1.665 | -1.754 |
| 36 | N71 | E16 | 1.457 | -1.457 |
| 37 | N71 | N70 | 1.277 | -1.210 |
| 38 | N72 | N70 | 1.148 | -1.179 |
| 39 | N73 | N96 | 1.552 | -1.742 |
| 40 | N73 | N70 | 1.456 | -1.254 |
| 41 | N73 | E28 | 1.086 | -2.258 |
| 42 | N76 | N96 | 1.936 | -2.207 |
| 43 | N76 | N70 | 1.748 | -1.564 |
| 44 | N76 | E28 | 1.076 | -2.860 |
| 45 | N80 | N70 | 1.693 | -1.348 |
| 46 | N83 | N70 | 1.823 | -1.044 |
| 47 | N83 | N96 | 1.278 | -1.900 |
| 48 | N83 | E28 | 1.210 | -2.311 |
| 49 | N85 | N96 | 1.405 | -1.271 |
| 50 | N86 | N70 | 1.730 | -1.414 |
| 51 | N86 | N96 | 1.296 | -2.412 |
| 52 | N91 | E28 | 1.530 | -1.818 |
| 53 | N92 | E28 | 3.429 | -1.972 |
| 54 | N92 | N96 | 2.580 | -1.916 |
| 55 | N92 | N70 | 1.096 | -1.523 |
| 56 | N93 | N96 | 2.175 | -1.653 |
| 57 | N93 | E28 | 1.204 | -2.106 |
| 58 | N94 | N96 | 1.625 | -1.930 |
| 59 | N94 | E28 | 1.309 | -2.047 |
| 60 | O20 | N96 | 6.550 | -1.552 |
| 61 | **N97** | E02 | 5.683 | -1.210 |
| 62 | **N97** | E03 | 1.530 | -1.516 |
| 63 | **N97** | E34 | 1.931 | -1.975 |
| 64 | **N97** | N61 | 1.621 | -2.213 |
| 65 | **N97** | N85 | 1.095 | -2.141 |
| 66 | **N97** | N94 | 1.360 | -1.930 |
| 67 | **N97** | N96 | 14.113 | -1.088 |
| 68 | **N97** | O00 | 1.252 | -1.597 |
| 69 | **N97** | O03 | 1.941 | -1.517 |
| 70 | **N97** | O13 | 2.138 | -2.012 |
| 71 | **N97** | O14 | 1.617 | -2.094 |
| 72 | **N97** | O16 | 4.589 | -2.512 |
| 73 | **N97** | O20 | 2.978 | -1.321 |
| 74 | **N97** | O24 | 2.484 | -2.029 |
| 75 | **N97** | O26 | 1.603 | -1.711 |
| 76 | **N97** | O28 | 6.057 | -1.619 |
| 77 | E03 | E79 | 1.782 | -2.523 |
| 78 | E03 | E83 | 1.627 | -1.872 |
| 79 | E03 | M81 | 1.609 | -2.489 |
| 80 | E03 | M10 | 1.275 | -2.874 |
| 81 | E03 | E78 | 1.229 | -2.318 |
| 82 | E03 | I50 | 1.175 | -2.510 |
| 83 | E03 | I70 | 1.156 | -2.726 |
| 84 | E03 | F41 | 1.148 | -2.965 |
| 85 | E03 | I20 | 1.145 | -2.999 |
| 86 | E03 | I24 | 1.115 | -2.970 |
| 87 | E03 | M25 | 1.079 | -3.039 |
| 88 | E03 | G47 | 1.044 | -2.760 |
| 89 | N94 | D26 | 1.885 | -2.104 |
| 90 | O13 | E77 | 2.684 | -0.768 |
| 91 | O13 | I10 | 1.160 | -2.514 |
| 92 | O14 | E77 | 7.554 | -0.328 |
| 93 | O14 | I50 | 1.977 | -1.220 |
| 94 | O14 | I10 | 1.545 | -2.117 |
| 95 | O14 | N03 | 1.467 | -2.072 |
| 96 | O14 | E79 | 1.238 | -3.297 |
| 97 | O20 | E77 | 1.104 | -2.261 |
| 98 | O24 | M93 | 2.854 | -0.142 |
| 99 | O24 | E77 | 1.577 | -1.135 |
| 100 | O24 | E11 | 1.533 | -3.519 |
| 101 | O24 | E14 | 1.360 | -2.374 |
| 102 | O26 | M93 | 13.837 | -0.453 |
| 103 | O26 | S32 | 9.288 | -0.563 |
| 104 | O26 | E83 | 2.770 | -1.516 |
| 105 | O26 | M51 | 1.587 | -1.751 |
| 106 | O26 | I67 | 1.511 | -1.464 |
| 107 | O26 | E77 | 1.480 | -1.871 |
