# Supplementary material for: The hidden burden of infertility: multimorbidity patterns and longitudinal disease trajectories in a population-based cohort of 2 million women
Source: Research Square preprint supplement (doi:10.21203/rs.3.rs-7308896/v1), 2025-09-09
Supplement: Supplementary file 3 [file e35a122df74004ed2ad3c37f.xlsx]

## Sheet: Sheet1
Appendix Table S1. List of ICD codes
ICD	Disease	Head	Chapter
A00	Cholera	A-B	Certain infectious and parasitic diseases
A01	Typhoid and paratyphoid fevers	A-B	Certain infectious and parasitic diseases
A02	Other salmonella infections	A-B	Certain infectious and parasitic diseases
A03	Shigellosis	A-B	Certain infectious and parasitic diseases
A04	Other bacterial intestinal infections	A-B	Certain infectious and parasitic diseases
A05	Other bacterial foodborne intoxications, not elsewhere classified	A-B	Certain infectious and parasitic diseases
A06	Amoebiasis	A-B	Certain infectious and parasitic diseases
A07	Other protozoal intestinal diseases	A-B	Certain infectious and parasitic diseases
A08	Viral and other specified intestinal infections	A-B	Certain infectious and parasitic diseases
A09	Other gastroenteritis and colitis of infectious and unspecified origin	A-B	Certain infectious and parasitic diseases
A15	Respiratory tuberculosis, bacteriologically and histologically confirmed	A-B	Certain infectious and parasitic diseases
A16	Respiratory tuberculosis, not confirmed bacteriologically or histologically	A-B	Certain infectious and parasitic diseases
A17	Tuberculosis of nervous system	A-B	Certain infectious and parasitic diseases
A18	Tuberculosis of other organs	A-B	Certain infectious and parasitic diseases
A19	Miliary tuberculosis	A-B	Certain infectious and parasitic diseases
A20	Plague	A-B	Certain infectious and parasitic diseases
A21	Tularaemia	A-B	Certain infectious and parasitic diseases
A22	Anthrax	A-B	Certain infectious and parasitic diseases
A23	Brucellosis	A-B	Certain infectious and parasitic diseases
A24	Glanders and melioidosis	A-B	Certain infectious and parasitic diseases
A26	Erysipeloid	A-B	Certain infectious and parasitic diseases
A27	Leptospirosis	A-B	Certain infectious and parasitic diseases
A28	Other zoonotic bacterial diseases, not elsewhere classified	A-B	Certain infectious and parasitic diseases
A30	Leprosy [Hansen disease]	A-B	Certain infectious and parasitic diseases
A31	Infection due to other mycobacteria	A-B	Certain infectious and parasitic diseases
A32	Listeriosis	A-B	Certain infectious and parasitic diseases
A33	Tetanus neonatorum	A-B	Certain infectious and parasitic diseases
A35	Other tetanus	A-B	Certain infectious and parasitic diseases
A36	Diphtheria	A-B	Certain infectious and parasitic diseases
A37	Whooping cough	A-B	Certain infectious and parasitic diseases
A38	Scarlet fever	A-B	Certain infectious and parasitic diseases
A39	Meningococcal infection	A-B	Certain infectious and parasitic diseases
A40	Streptococcal sepsis	A-B	Certain infectious and parasitic diseases
A41	Other sepsis	A-B	Certain infectious and parasitic diseases
A42	Actinomycosis	A-B	Certain infectious and parasitic diseases
A43	Nocardiosis	A-B	Certain infectious and parasitic diseases
A46	Erysipelas	A-B	Certain infectious and parasitic diseases
A48	Other bacterial diseases, not elsewhere classified	A-B	Certain infectious and parasitic diseases
A49	Bacterial infection of unspecified site	A-B	Certain infectious and parasitic diseases
A50	Congenital syphilis	A-B	Certain infectious and parasitic diseases
A51	Early syphilis	A-B	Certain infectious and parasitic diseases
A52	Late syphilis	A-B	Certain infectious and parasitic diseases
A53	Other and unspecified syphilis	A-B	Certain infectious and parasitic diseases
A54	Gonococcal infection	A-B	Certain infectious and parasitic diseases
A56	Other sexually transmitted chlamydial diseases	A-B	Certain infectious and parasitic diseases
A57	Chancroid	A-B	Certain infectious and parasitic diseases
A58	Granuloma inguinale	A-B	Certain infectious and parasitic diseases
A59	Trichomoniasis	A-B	Certain infectious and parasitic diseases
A60	Anogenital herpesviral [herpes simplex] infection	A-B	Certain infectious and parasitic diseases
A63	Other predominantly sexually transmitted diseases, not elsewhere classified	A-B	Certain infectious and parasitic diseases
A64	Unspecified sexually transmitted disease	A-B	Certain infectious and parasitic diseases
A66	Yaws	A-B	Certain infectious and parasitic diseases
A67	Pinta [carate]	A-B	Certain infectious and parasitic diseases
A68	Relapsing fevers	A-B	Certain infectious and parasitic diseases
A69	Other spirochaetal infections	A-B	Certain infectious and parasitic diseases
A70	Chlamydia psittaci infection	A-B	Certain infectious and parasitic diseases
A71	Trachoma	A-B	Certain infectious and parasitic diseases
A74	Other diseases caused by chlamydiae	A-B	Certain infectious and parasitic diseases
A75	Typhus fever	A-B	Certain infectious and parasitic diseases
A77	Spotted fever [tick-borne rickettsioses]	A-B	Certain infectious and parasitic diseases
A78	Q fever	A-B	Certain infectious and parasitic diseases
A79	Other rickettsioses	A-B	Certain infectious and parasitic diseases
A80	Acute poliomyelitis	A-B	Certain infectious and parasitic diseases
A81	Atypical virus infections of central nervous system	A-B	Certain infectious and parasitic diseases
A82	Rabies	A-B	Certain infectious and parasitic diseases
A83	Mosquito-borne viral encephalitis	A-B	Certain infectious and parasitic diseases
A84	Tick-borne viral encephalitis	A-B	Certain infectious and parasitic diseases
A86	Unspecified viral encephalitis	A-B	Certain infectious and parasitic diseases
A87	Viral meningitis	A-B	Certain infectious and parasitic diseases
A88	Other viral infections of central nervous system, not elsewhere classified	A-B	Certain infectious and parasitic diseases
A89	Unspecified viral infection of central nervous system	A-B	Certain infectious and parasitic diseases
A90	Dengue fever [classical dengue]	A-B	Certain infectious and parasitic diseases
A92	Other mosquito-borne viral fevers	A-B	Certain infectious and parasitic diseases
A93	Other arthropod-borne viral fevers, not elsewhere classified	A-B	Certain infectious and parasitic diseases
A95	Yellow fever	A-B	Certain infectious and parasitic diseases
A96	Arenaviral haemorrhagic fever	A-B	Certain infectious and parasitic diseases
A98	Other viral haemorrhagic fevers, not elsewhere classified	A-B	Certain infectious and parasitic diseases
B00	Herpesviral [herpes simplex] infections	A-B	Certain infectious and parasitic diseases
B01	Varicella [chickenpox]	A-B	Certain infectious and parasitic diseases
B02	Zoster [herpes zoster]	A-B	Certain infectious and parasitic diseases
B03	Smallpox	A-B	Certain infectious and parasitic diseases
B04	Monkeypox	A-B	Certain infectious and parasitic diseases
B05	Measles	A-B	Certain infectious and parasitic diseases
B06	Rubella [German measles]	A-B	Certain infectious and parasitic diseases
B07	Viral warts	A-B	Certain infectious and parasitic diseases
B08	Other viral infections characterized by skin and mucous membrane lesions, not elsewhere classified	A-B	Certain infectious and parasitic diseases
B09	Unspecified viral infection characterized by skin and mucous membrane lesions	A-B	Certain infectious and parasitic diseases
B15	Acute hepatitis A	A-B	Certain infectious and parasitic diseases
B16	Acute hepatitis B	A-B	Certain infectious and parasitic diseases
B17	Other acute viral hepatitis	A-B	Certain infectious and parasitic diseases
B18	Chronic viral hepatitis	A-B	Certain infectious and parasitic diseases
B19	Unspecified viral hepatitis	A-B	Certain infectious and parasitic diseases
B20	Human immunodeficiency virus [HIV] disease resulting in infectious and parasitic diseases	A-B	Certain infectious and parasitic diseases
B21	Human immunodeficiency virus [HIV] disease resulting in malignant neoplasms	A-B	Certain infectious and parasitic diseases
B22	Human immunodeficiency virus [HIV] disease resulting in other specified diseases	A-B	Certain infectious and parasitic diseases
B23	Human immunodeficiency virus [HIV] disease resulting in other conditions	A-B	Certain infectious and parasitic diseases
B24	Unspecified human immunodeficiency virus [HIV] disease	A-B	Certain infectious and parasitic diseases
B25	Cytomegaloviral disease	A-B	Certain infectious and parasitic diseases
B26	Mumps	A-B	Certain infectious and parasitic diseases
B27	Infectious mononucleosis	A-B	Certain infectious and parasitic diseases
B30	Viral conjunctivitis	A-B	Certain infectious and parasitic diseases
B33	Other viral diseases, not elsewhere classified	A-B	Certain infectious and parasitic diseases
B34	Viral infection of unspecified site	A-B	Certain infectious and parasitic diseases
B35	Dermatophytosis	A-B	Certain infectious and parasitic diseases
B36	Other superficial mycoses	A-B	Certain infectious and parasitic diseases
B37	Candidiasis	A-B	Certain infectious and parasitic diseases
B38	Coccidioidomycosis	A-B	Certain infectious and parasitic diseases
B42	Sporotrichosis	A-B	Certain infectious and parasitic diseases
B43	Chromomycosis and phaeomycotic abscess	A-B	Certain infectious and parasitic diseases
B44	Aspergillosis	A-B	Certain infectious and parasitic diseases
B45	Cryptococcosis	A-B	Certain infectious and parasitic diseases
B46	Zygomycosis	A-B	Certain infectious and parasitic diseases
B47	Mycetoma	A-B	Certain infectious and parasitic diseases
B48	Other mycoses, not elsewhere classified	A-B	Certain infectious and parasitic diseases
B49	Unspecified mycosis	A-B	Certain infectious and parasitic diseases
B50	Plasmodium falciparum malaria	A-B	Certain infectious and parasitic diseases
B52	Plasmodium malariae malaria	A-B	Certain infectious and parasitic diseases
B54	Unspecified malaria	A-B	Certain infectious and parasitic diseases
B55	Leishmaniasis	A-B	Certain infectious and parasitic diseases
B57	Chagas disease	A-B	Certain infectious and parasitic diseases
B58	Toxoplasmosis	A-B	Certain infectious and parasitic diseases
B59	Pneumocystosis	A-B	Certain infectious and parasitic diseases
B60	Other protozoal diseases, not elsewhere classified	A-B	Certain infectious and parasitic diseases
B66	Other fluke infections	A-B	Certain infectious and parasitic diseases
B67	Echinococcosis	A-B	Certain infectious and parasitic diseases
B68	Taeniasis	A-B	Certain infectious and parasitic diseases
B69	Cysticercosis	A-B	Certain infectious and parasitic diseases
B71	Other cestode infections	A-B	Certain infectious and parasitic diseases
B73	Onchocerciasis	A-B	Certain infectious and parasitic diseases
B74	Filariasis	A-B	Certain infectious and parasitic diseases
B76	Hookworm diseases	A-B	Certain infectious and parasitic diseases
B77	Ascariasis	A-B	Certain infectious and parasitic diseases
B80	Enterobiasis	A-B	Certain infectious and parasitic diseases
B81	Other intestinal helminthiases, not elsewhere classified	A-B	Certain infectious and parasitic diseases
B82	Unspecified intestinal parasitism	A-B	Certain infectious and parasitic diseases
B83	Other helminthiases	A-B	Certain infectious and parasitic diseases
B85	Pediculosis and phthiriasis	A-B	Certain infectious and parasitic diseases
B86	Scabies	A-B	Certain infectious and parasitic diseases
B87	Myiasis	A-B	Certain infectious and parasitic diseases
B88	Other infestations	A-B	Certain infectious and parasitic diseases
B89	Unspecified parasitic disease	A-B	Certain infectious and parasitic diseases
B90	Sequelae of tuberculosis	A-B	Certain infectious and parasitic diseases
B91	Sequelae of poliomyelitis	A-B	Certain infectious and parasitic diseases
B94	Sequelae of other and unspecified infectious and parasitic diseases	A-B	Certain infectious and parasitic diseases
B95	Streptococcus and staphylococcus as the cause of diseases classified to other chapters	A-B	Certain infectious and parasitic diseases
B96	Other specified bacterial agents as the cause of diseases classified to other chapters	A-B	Certain infectious and parasitic diseases
B97	Viral agents as the cause of diseases classified to other chapters	A-B	Certain infectious and parasitic diseases
B98	Other specified infectious agents as the cause of diseases classified to other chapters	A-B	Certain infectious and parasitic diseases
B99	Other and unspecified infectious diseases	A-B	Certain infectious and parasitic diseases
C00	Malignant neoplasm of lip	C-D	Neoplasms
C01	Malignant neoplasm of base of tongue	C-D	Neoplasms
C02	Malignant neoplasm of other and unspecified parts of tongue	C-D	Neoplasms
C03	Malignant neoplasm of gum	C-D	Neoplasms
C04	Malignant neoplasm of floor of mouth	C-D	Neoplasms
C05	Malignant neoplasm of palate	C-D	Neoplasms
C06	Malignant neoplasm of other and unspecified parts of mouth	C-D	Neoplasms
C07	Malignant neoplasm of parotid gland	C-D	Neoplasms
C08	Malignant neoplasm of other and unspecified major salivary glands	C-D	Neoplasms
C09	Malignant neoplasm of tonsil	C-D	Neoplasms
C10	Malignant neoplasm of oropharynx	C-D	Neoplasms
C11	Malignant neoplasm of nasopharynx	C-D	Neoplasms
C12	Malignant neoplasm of piriform sinus	C-D	Neoplasms
C13	Malignant neoplasm of hypopharynx	C-D	Neoplasms
C14	Malignant neoplasm of other and ill-defined sites in the lip, oral cavity and pharynx	C-D	Neoplasms
C15	Malignant neoplasm of oesophagus	C-D	Neoplasms
C16	Malignant neoplasm of stomach	C-D	Neoplasms
C17	Malignant neoplasm of small intestine	C-D	Neoplasms
C18	Malignant neoplasm of colon	C-D	Neoplasms
C19	Malignant neoplasm of rectosigmoid junction	C-D	Neoplasms
C20	Malignant neoplasm of rectum	C-D	Neoplasms
C21	Malignant neoplasm of anus and anal canal	C-D	Neoplasms
C22	Malignant neoplasm of liver and intrahepatic bile ducts	C-D	Neoplasms
C23	Malignant neoplasm of gallbladder	C-D	Neoplasms
C24	Malignant neoplasm of other and unspecified parts of biliary tract	C-D	Neoplasms
C25	Malignant neoplasm of pancreas	C-D	Neoplasms
C26	Malignant neoplasm of other and ill-defined digestive organs	C-D	Neoplasms
C30	Malignant neoplasm of nasal cavity and middle ear	C-D	Neoplasms
C31	Malignant neoplasm of accessory sinuses	C-D	Neoplasms
C32	Malignant neoplasm of larynx	C-D	Neoplasms
C33	Malignant neoplasm of trachea	C-D	Neoplasms
C34	Malignant neoplasm of bronchus and lung	C-D	Neoplasms
C37	Malignant neoplasm of thymus	C-D	Neoplasms
C38	Malignant neoplasm of heart, mediastinum and pleura	C-D	Neoplasms
C39	Malignant neoplasm of other and ill-defined sites in the respiratory system and intrathoracic organs	C-D	Neoplasms
C40	Malignant neoplasm of bone and articular cartilage of limbs	C-D	Neoplasms
C41	Malignant neoplasm of bone and articular cartilage of other and unspecified sites	C-D	Neoplasms
C43	Malignant melanoma of skin	C-D	Neoplasms
C44	Other malignant neoplasms of skin	C-D	Neoplasms
C45	Mesothelioma	C-D	Neoplasms
C46	Kaposi sarcoma	C-D	Neoplasms
C47	Malignant neoplasm of peripheral nerves and autonomic nervous system	C-D	Neoplasms
C48	Malignant neoplasm of retroperitoneum and peritoneum	C-D	Neoplasms
C49	Malignant neoplasm of other connective and soft tissue	C-D	Neoplasms
C50	Malignant neoplasm of breast	C-D	Neoplasms
C51	Malignant neoplasm of vulva	C-D	Neoplasms
C52	Malignant neoplasm of vagina	C-D	Neoplasms
C53	Malignant neoplasm of cervix uteri	C-D	Neoplasms
C54	Malignant neoplasm of corpus uteri	C-D	Neoplasms
C55	Malignant neoplasm of uterus, part unspecified	C-D	Neoplasms
C56	Malignant neoplasm of ovary	C-D	Neoplasms
C57	Malignant neoplasm of other and unspecified female genital organs	C-D	Neoplasms
C58	Malignant neoplasm of placenta	C-D	Neoplasms
C64	Malignant neoplasm of kidney, except renal pelvis	C-D	Neoplasms
C65	Malignant neoplasm of renal pelvis	C-D	Neoplasms
C66	Malignant neoplasm of ureter	C-D	Neoplasms
C67	Malignant neoplasm of bladder	C-D	Neoplasms
C68	Malignant neoplasm of other and unspecified urinary organs	C-D	Neoplasms
C69	Malignant neoplasm of eye and adnexa	C-D	Neoplasms
C70	Malignant neoplasm of meninges	C-D	Neoplasms
C71	Malignant neoplasm of brain	C-D	Neoplasms
C72	Malignant neoplasm of spinal cord, cranial nerves and other parts of central nervous system	C-D	Neoplasms
C73	Malignant neoplasm of thyroid gland	C-D	Neoplasms
C74	Malignant neoplasm of adrenal gland	C-D	Neoplasms
C75	Malignant neoplasm of other endocrine glands and related structures	C-D	Neoplasms
C76	Malignant neoplasm of other and ill-defined sites	C-D	Neoplasms
C77	Secondary and unspecified malignant neoplasm of lymph nodes	C-D	Neoplasms
C78	Secondary malignant neoplasm of respiratory and digestive organs	C-D	Neoplasms
C79	Secondary malignant neoplasm of other and unspecified sites	C-D	Neoplasms
C80	Malignant neoplasm, without specification of site	C-D	Neoplasms
C81	Hodgkin lymphoma	C-D	Neoplasms
C82	Follicular lymphoma	C-D	Neoplasms
C83	Non-follicular lymphoma	C-D	Neoplasms
C84	Mature T/NK-cell lymphomas	C-D	Neoplasms
C85	Other and unspecified types of non-Hodgkin lymphoma	C-D	Neoplasms
C88	Malignant immunoproliferative diseases	C-D	Neoplasms
C90	Multiple myeloma and malignant plasma cell neoplasms	C-D	Neoplasms
C91	Lymphoid leukaemia	C-D	Neoplasms
C92	Myeloid leukaemia	C-D	Neoplasms
C93	Monocytic leukaemia	C-D	Neoplasms
C94	Other leukaemias of specified cell type	C-D	Neoplasms
C95	Leukaemia of unspecified cell type	C-D	Neoplasms
C96	Other and unspecified malignant neoplasms of lymphoid, haematopoietic and related tissue	C-D	Neoplasms
C97	Malignant neoplasms of independent (primary) multiple sites	C-D	Neoplasms
D00	Carcinoma in situ of oral cavity, oesophagus and stomach	C-D	Neoplasms
D01	Carcinoma in situ of other and unspecified digestive organs	C-D	Neoplasms
D02	Carcinoma in situ of middle ear and respiratory system	C-D	Neoplasms
D03	Melanoma in situ	C-D	Neoplasms
D04	Carcinoma in situ of skin	C-D	Neoplasms
D05	Carcinoma in situ of breast	C-D	Neoplasms
D06	Carcinoma in situ of cervix uteri	C-D	Neoplasms
D07	Carcinoma in situ of other and unspecified genital organs	C-D	Neoplasms
D09	Carcinoma in situ of other and unspecified sites	C-D	Neoplasms
D10	Benign neoplasm of mouth and pharynx	C-D	Neoplasms
D11	Benign neoplasm of major salivary glands	C-D	Neoplasms
D12	Benign neoplasm of colon, rectum, anus and anal canal	C-D	Neoplasms
D13	Benign neoplasm of other and ill-defined parts of digestive system	C-D	Neoplasms
D14	Benign neoplasm of middle ear and respiratory system	C-D	Neoplasms
D15	Benign neoplasm of other and unspecified intrathoracic organs	C-D	Neoplasms
D16	Benign neoplasm of bone and articular cartilage	C-D	Neoplasms
D17	Benign lipomatous neoplasm	C-D	Neoplasms
D18	Haemangioma and lymphangioma, any site	C-D	Neoplasms
D19	Benign neoplasm of mesothelial tissue	C-D	Neoplasms
D20	Benign neoplasm of soft tissue of retroperitoneum and peritoneum	C-D	Neoplasms
D21	Other benign neoplasms of connective and other soft tissue	C-D	Neoplasms
D22	Melanocytic naevi	C-D	Neoplasms
D23	Other benign neoplasms of skin	C-D	Neoplasms
D24	Benign neoplasm of breast	C-D	Neoplasms
D25	Leiomyoma of uterus	C-D	Neoplasms
D26	Other benign neoplasms of uterus	C-D	Neoplasms
D27	Benign neoplasm of ovary	C-D	Neoplasms
D28	Benign neoplasm of other and unspecified female genital organs	C-D	Neoplasms
D30	Benign neoplasm of urinary organs	C-D	Neoplasms
D31	Benign neoplasm of eye and adnexa	C-D	Neoplasms
D32	Benign neoplasm of meninges	C-D	Neoplasms
D33	Benign neoplasm of brain and other parts of central nervous system	C-D	Neoplasms
D34	Benign neoplasm of thyroid gland	C-D	Neoplasms
D35	Benign neoplasm of other and unspecified endocrine glands	C-D	Neoplasms
D36	Benign neoplasm of other and unspecified sites	C-D	Neoplasms
D37	Neoplasm of uncertain or unknown behaviour of oral cavity and digestive organs	C-D	Neoplasms
D38	Neoplasm of uncertain or unknown behaviour of middle ear and respiratory and intrathoracic organs	C-D	Neoplasms
D39	Neoplasm of uncertain or unknown behaviour of female genital organs	C-D	Neoplasms
D40	Neoplasm of uncertain or unknown behaviour of male genital organs	C-D	Neoplasms
D41	Neoplasm of uncertain or unknown behaviour of urinary organs	C-D	Neoplasms
D42	Neoplasm of uncertain or unknown behaviour of meninges	C-D	Neoplasms
D43	Neoplasm of uncertain or unknown behaviour of brain and central nervous system	C-D	Neoplasms
D44	Neoplasm of uncertain or unknown behaviour of endocrine glands	C-D	Neoplasms
D45	Polycythaemia vera	C-D	Neoplasms
D46	Myelodysplastic syndromes	C-D	Neoplasms
D47	Other neoplasms of uncertain or unknown behaviour of lymphoid, haematopoietic and related tissue	C-D	Neoplasms
D48	Neoplasm of uncertain or unknown behaviour of other and unspecified sites	C-D	Neoplasms
D50	Iron deficiency anaemia	D	Diseases of the blood and blood-forming organs and certain disorders involving the immune mechanism
D51	Vitamin B12 deficiency anaemia	D	Diseases of the blood and blood-forming organs and certain disorders involving the immune mechanism
D52	Folate deficiency anaemia	D	Diseases of the blood and blood-forming organs and certain disorders involving the immune mechanism
D53	Other nutritional anaemias	D	Diseases of the blood and blood-forming organs and certain disorders involving the immune mechanism
D55	Anaemia due to enzyme disorders	D	Diseases of the blood and blood-forming organs and certain disorders involving the immune mechanism
D56	Thalassaemia	D	Diseases of the blood and blood-forming organs and certain disorders involving the immune mechanism
D57	Sickle-cell disorders	D	Diseases of the blood and blood-forming organs and certain disorders involving the immune mechanism
D58	Other hereditary haemolytic anaemias	D	Diseases of the blood and blood-forming organs and certain disorders involving the immune mechanism
D59	Acquired haemolytic anaemia	D	Diseases of the blood and blood-forming organs and certain disorders involving the immune mechanism
D60	Acquired pure red cell aplasia [erythroblastopenia]	D	Diseases of the blood and blood-forming organs and certain disorders involving the immune mechanism
D61	Other aplastic anaemias	D	Diseases of the blood and blood-forming organs and certain disorders involving the immune mechanism
D62	Acute posthaemorrhagic anaemia	D	Diseases of the blood and blood-forming organs and certain disorders involving the immune mechanism
D63	Anaemia in chronic diseases classified elsewhere	D	Diseases of the blood and blood-forming organs and certain disorders involving the immune mechanism
D64	Other anaemias	D	Diseases of the blood and blood-forming organs and certain disorders involving the immune mechanism
D65	Disseminated intravascular coagulation [defibrination syndrome]	D	Diseases of the blood and blood-forming organs and certain disorders involving the immune mechanism
D66	Hereditary factor VIII deficiency	D	Diseases of the blood and blood-forming organs and certain disorders involving the immune mechanism
D67	Hereditary factor IX deficiency	D	Diseases of the blood and blood-forming organs and certain disorders involving the immune mechanism
D68	Other coagulation defects	D	Diseases of the blood and blood-forming organs and certain disorders involving the immune mechanism
D69	Purpura and other haemorrhagic conditions	D	Diseases of the blood and blood-forming organs and certain disorders involving the immune mechanism
D70	Agranulocytosis	D	Diseases of the blood and blood-forming organs and certain disorders involving the immune mechanism
D71	Functional disorders of polymorphonuclear neutrophils	D	Diseases of the blood and blood-forming organs and certain disorders involving the immune mechanism
D72	Other disorders of white blood cells	D	Diseases of the blood and blood-forming organs and certain disorders involving the immune mechanism
D73	Diseases of spleen	D	Diseases of the blood and blood-forming organs and certain disorders involving the immune mechanism
D74	Methaemoglobinaemia	D	Diseases of the blood and blood-forming organs and certain disorders involving the immune mechanism
D75	Other diseases of blood and blood-forming organs	D	Diseases of the blood and blood-forming organs and certain disorders involving the immune mechanism
D76	Other specified diseases with participation of lymphoreticular and reticulohistiocytic tissue	D	Diseases of the blood and blood-forming organs and certain disorders involving the immune mechanism
D77	Other disorders of blood and blood-forming organs in diseases classified elsewhere	D	Diseases of the blood and blood-forming organs and certain disorders involving the immune mechanism
D80	Immunodeficiency with predominantly antibody defects	D	Diseases of the blood and blood-forming organs and certain disorders involving the immune mechanism
D81	Combined immunodeficiencies	D	Diseases of the blood and blood-forming organs and certain disorders involving the immune mechanism
D82	Immunodeficiency associated with other major defects	D	Diseases of the blood and blood-forming organs and certain disorders involving the immune mechanism
D83	Common variable immunodeficiency	D	Diseases of the blood and blood-forming organs and certain disorders involving the immune mechanism
D84	Other immunodeficiencies	D	Diseases of the blood and blood-forming organs and certain disorders involving the immune mechanism
D86	Sarcoidosis	D	Diseases of the blood and blood-forming organs and certain disorders involving the immune mechanism
D89	Other disorders involving the immune mechanism, not elsewhere classified	D	Diseases of the blood and blood-forming organs and certain disorders involving the immune mechanism
E00	Congenital iodine-deficiency syndrome	E	Endocrine, nutritional and metabolic diseases
E01	Iodine-deficiency-related thyroid disorders and allied conditions	E	Endocrine, nutritional and metabolic diseases
E02	Subclinical iodine-deficiency hypothyroidism	E	Endocrine, nutritional and metabolic diseases
E03	Other hypothyroidism	E	Endocrine, nutritional and metabolic diseases
E04	Other nontoxic goitre	E	Endocrine, nutritional and metabolic diseases
E05	Thyrotoxicosis [hyperthyroidism]	E	Endocrine, nutritional and metabolic diseases
E06	Thyroiditis	E	Endocrine, nutritional and metabolic diseases
E07	Other disorders of thyroid	E	Endocrine, nutritional and metabolic diseases
E10	Type 1 diabetes mellitus	E	Endocrine, nutritional and metabolic diseases
E11	Type 2 diabetes mellitus	E	Endocrine, nutritional and metabolic diseases
E12	Malnutrition-related diabetes mellitus	E	Endocrine, nutritional and metabolic diseases
E13	Other specified diabetes mellitus	E	Endocrine, nutritional and metabolic diseases
E14	Unspecified diabetes mellitus	E	Endocrine, nutritional and metabolic diseases
E15	Nondiabetic hypoglycaemic coma	E	Endocrine, nutritional and metabolic diseases
E16	Other disorders of pancreatic internal secretion	E	Endocrine, nutritional and metabolic diseases
E20	Hypoparathyroidism	E	Endocrine, nutritional and metabolic diseases
E21	Hyperparathyroidism and other disorders of parathyroid gland	E	Endocrine, nutritional and metabolic diseases
E22	Hyperfunction of pituitary gland	E	Endocrine, nutritional and metabolic diseases
E23	Hypofunction and other disorders of pituitary gland	E	Endocrine, nutritional and metabolic diseases
E24	Cushing syndrome	E	Endocrine, nutritional and metabolic diseases
E25	Adrenogenital disorders	E	Endocrine, nutritional and metabolic diseases
E26	Hyperaldosteronism	E	Endocrine, nutritional and metabolic diseases
E27	Other disorders of adrenal gland	E	Endocrine, nutritional and metabolic diseases
E28	Ovarian dysfunction	E	Endocrine, nutritional and metabolic diseases
E30	Disorders of puberty, not elsewhere classified	E	Endocrine, nutritional and metabolic diseases
E31	Polyglandular dysfunction	E	Endocrine, nutritional and metabolic diseases
E32	Diseases of thymus	E	Endocrine, nutritional and metabolic diseases
E34	Other endocrine disorders	E	Endocrine, nutritional and metabolic diseases
E35	Disorders of endocrine glands in diseases classified elsewhere	E	Endocrine, nutritional and metabolic diseases
E40	Kwashiorkor	E	Endocrine, nutritional and metabolic diseases
E41	Nutritional marasmus	E	Endocrine, nutritional and metabolic diseases
E42	Marasmic kwashiorkor	E	Endocrine, nutritional and metabolic diseases
E43	Unspecified severe protein-energy malnutrition	E	Endocrine, nutritional and metabolic diseases
E44	Protein-energy malnutrition of moderate and mild degree	E	Endocrine, nutritional and metabolic diseases
E45	Retarded development following protein-energy malnutrition	E	Endocrine, nutritional and metabolic diseases
E46	Unspecified protein-energy malnutrition	E	Endocrine, nutritional and metabolic diseases
E50	Vitamin A deficiency	E	Endocrine, nutritional and metabolic diseases
E51	Thiamine deficiency	E	Endocrine, nutritional and metabolic diseases
E52	Niacin deficiency [pellagra]	E	Endocrine, nutritional and metabolic diseases
E53	Deficiency of other B group vitamins	E	Endocrine, nutritional and metabolic diseases
E54	Ascorbic acid deficiency	E	Endocrine, nutritional and metabolic diseases
E55	Vitamin D deficiency	E	Endocrine, nutritional and metabolic diseases
E56	Other vitamin deficiencies	E	Endocrine, nutritional and metabolic diseases
E58	Dietary calcium deficiency	E	Endocrine, nutritional and metabolic diseases
E59	Dietary selenium deficiency	E	Endocrine, nutritional and metabolic diseases
E60	Dietary zinc deficiency	E	Endocrine, nutritional and metabolic diseases
E61	Deficiency of other nutrient elements	E	Endocrine, nutritional and metabolic diseases
E63	Other nutritional deficiencies	E	Endocrine, nutritional and metabolic diseases
E64	Sequelae of malnutrition and other nutritional deficiencies	E	Endocrine, nutritional and metabolic diseases
E65	Localized adiposity	E	Endocrine, nutritional and metabolic diseases
E66	Obesity	E	Endocrine, nutritional and metabolic diseases
E67	Other hyperalimentation	E	Endocrine, nutritional and metabolic diseases
E68	Sequelae of hyperalimentation	E	Endocrine, nutritional and metabolic diseases
E70	Disorders of aromatic amino-acid metabolism	E	Endocrine, nutritional and metabolic diseases
E71	Disorders of branched-chain amino-acid metabolism and fatty-acid metabolism	E	Endocrine, nutritional and metabolic diseases
E72	Other disorders of amino-acid metabolism	E	Endocrine, nutritional and metabolic diseases
E73	Lactose intolerance	E	Endocrine, nutritional and metabolic diseases
E74	Other disorders of carbohydrate metabolism	E	Endocrine, nutritional and metabolic diseases
E75	Disorders of sphingolipid metabolism and other lipid storage disorders	E	Endocrine, nutritional and metabolic diseases
E76	Disorders of glycosaminoglycan metabolism	E	Endocrine, nutritional and metabolic diseases
E77	Disorders of glycoprotein metabolism	E	Endocrine, nutritional and metabolic diseases
E78	Disorders of lipoprotein metabolism and other lipidaemias	E	Endocrine, nutritional and metabolic diseases
E79	Disorders of purine and pyrimidine metabolism	E	Endocrine, nutritional and metabolic diseases
E80	Disorders of porphyrin and bilirubin metabolism	E	Endocrine, nutritional and metabolic diseases
E83	Disorders of mineral metabolism	E	Endocrine, nutritional and metabolic diseases
E84	Cystic fibrosis	E	Endocrine, nutritional and metabolic diseases
E85	Amyloidosis	E	Endocrine, nutritional and metabolic diseases
E86	Volume depletion	E	Endocrine, nutritional and metabolic diseases
E87	Other disorders of fluid, electrolyte and acid-base balance	E	Endocrine, nutritional and metabolic diseases
E88	Other metabolic disorders	E	Endocrine, nutritional and metabolic diseases
E89	Postprocedural endocrine and metabolic disorders, not elsewhere classified	E	Endocrine, nutritional and metabolic diseases
F00	Dementia in Alzheimer disease	F	Mental and behavioural disorders
F01	Vascular dementia	F	Mental and behavioural disorders
F02	Dementia in other diseases classified elsewhere	F	Mental and behavioural disorders
F03	Unspecified dementia	F	Mental and behavioural disorders
F04	Organic amnesic syndrome, not induced by alcohol and other psychoactive substances	F	Mental and behavioural disorders
F05	Delirium, not induced by alcohol and other psychoactive substances	F	Mental and behavioural disorders
F06	Other mental disorders due to brain damage and dysfunction and to physical disease	F	Mental and behavioural disorders
F07	Personality and behavioural disorders due to brain disease, damage and dysfunction	F	Mental and behavioural disorders
F09	Unspecified organic or symptomatic mental disorder	F	Mental and behavioural disorders
F10	Mental and behavioural disorders due to use of alcohol	F	Mental and behavioural disorders
F13	Mental and behavioural disorders due to use of sedatives or hypnotics	F	Mental and behavioural disorders
F15	Mental and behavioural disorders due to use of other stimulants, including caffeine	F	Mental and behavioural disorders
F16	Mental and behavioural disorders due to use of hallucinogens	F	Mental and behavioural disorders
F17	Mental and behavioural disorders due to use of tobacco	F	Mental and behavioural disorders
F18	Mental and behavioural disorders due to use of volatile solvents	F	Mental and behavioural disorders
F19	Mental and behavioural disorders due to multiple drug use and use of other psychoactive substances	F	Mental and behavioural disorders
F20	Schizophrenia	F	Mental and behavioural disorders
F21	Schizotypal disorder	F	Mental and behavioural disorders
F22	Persistent delusional disorders	F	Mental and behavioural disorders
F23	Acute and transient psychotic disorders	F	Mental and behavioural disorders
F25	Schizoaffective disorders	F	Mental and behavioural disorders
F28	Other nonorganic psychotic disorders	F	Mental and behavioural disorders
F29	Unspecified nonorganic psychosis	F	Mental and behavioural disorders
F30	Manic episode	F	Mental and behavioural disorders
F31	Bipolar affective disorder	F	Mental and behavioural disorders
F32	Depressive episode	F	Mental and behavioural disorders
F33	Recurrent depressive disorder	F	Mental and behavioural disorders
F34	Persistent mood [affective] disorders	F	Mental and behavioural disorders
F38	Other mood [affective] disorders	F	Mental and behavioural disorders
F39	Unspecified mood [affective] disorder	F	Mental and behavioural disorders
F40	Phobic anxiety disorders	F	Mental and behavioural disorders
F41	Other anxiety disorders	F	Mental and behavioural disorders
F42	Obsessive-compulsive disorder	F	Mental and behavioural disorders
F43	Reaction to severe stress, and adjustment disorders	F	Mental and behavioural disorders
F44	Dissociative [conversion] disorders	F	Mental and behavioural disorders
F45	Somatoform disorders	F	Mental and behavioural disorders
F48	Other neurotic disorders	F	Mental and behavioural disorders
F50	Eating disorders	F	Mental and behavioural disorders
F51	Nonorganic sleep disorders	F	Mental and behavioural disorders
F52	Sexual dysfunction, not caused by organic disorder or disease	F	Mental and behavioural disorders
F53	Mental and behavioural disorders associated with the puerperium, not elsewhere classified	F	Mental and behavioural disorders
F54	Psychological and behavioural factors associated with disorders or diseases classified elsewhere	F	Mental and behavioural disorders
F55	Abuse of non-dependence-producing substances	F	Mental and behavioural disorders
F60	Specific personality disorders	F	Mental and behavioural disorders
F62	Enduring personality changes, not attributable to brain damage and disease	F	Mental and behavioural disorders
F63	Habit and impulse disorders	F	Mental and behavioural disorders
F64	Gender identity disorders	F	Mental and behavioural disorders
F65	Disorders of sexual preference	F	Mental and behavioural disorders
F66	Psychological and behavioural disorders associated with sexual development and orientation	F	Mental and behavioural disorders
F68	Other disorders of adult personality and behaviour	F	Mental and behavioural disorders
F69	Unspecified disorder of adult personality and behaviour	F	Mental and behavioural disorders
F70	Mild mental retardation	F	Mental and behavioural disorders
F71	Moderate mental retardation	F	Mental and behavioural disorders
F78	Other mental retardation	F	Mental and behavioural disorders
F79	Unspecified mental retardation	F	Mental and behavioural disorders
F80	Specific developmental disorders of speech and language	F	Mental and behavioural disorders
F81	Specific developmental disorders of scholastic skills	F	Mental and behavioural disorders
F84	Pervasive developmental disorders	F	Mental and behavioural disorders
F89	Unspecified disorder of psychological development	F	Mental and behavioural disorders
F90	Hyperkinetic disorders	F	Mental and behavioural disorders
F91	Conduct disorders	F	Mental and behavioural disorders
F92	Mixed disorders of conduct and emotions	F	Mental and behavioural disorders
F93	Emotional disorders with onset specific to childhood	F	Mental and behavioural disorders
F95	Tic disorders	F	Mental and behavioural disorders
F98	Other behavioural and emotional disorders with onset usually occurring in childhood and adolescence	F	Mental and behavioural disorders
F99	Mental disorder, not otherwise specified	F	Mental and behavioural disorders
G00	Bacterial meningitis, not elsewhere classified	G	Diseases of the nervous system
G01	Meningitis in bacterial diseases classified elsewhere	G	Diseases of the nervous system
G03	Meningitis due to other and unspecified causes	G	Diseases of the nervous system
G04	Encephalitis, myelitis and encephalomyelitis	G	Diseases of the nervous system
G05	Encephalitis, myelitis and encephalomyelitis in diseases classified elsewhere	G	Diseases of the nervous system
G06	Intracranial and intraspinal abscess and granuloma	G	Diseases of the nervous system
G08	Intracranial and intraspinal phlebitis and thrombophlebitis	G	Diseases of the nervous system
G09	Sequelae of inflammatory diseases of central nervous system	G	Diseases of the nervous system
G10	Huntington disease	G	Diseases of the nervous system
G11	Hereditary ataxia	G	Diseases of the nervous system
G12	Spinal muscular atrophy and related syndromes	G	Diseases of the nervous system
G20	Parkinson disease	G	Diseases of the nervous system
G21	Secondary parkinsonism	G	Diseases of the nervous system
G23	Other degenerative diseases of basal ganglia	G	Diseases of the nervous system
G24	Dystonia	G	Diseases of the nervous system
G25	Other extrapyramidal and movement disorders	G	Diseases of the nervous system
G30	Alzheimer disease	G	Diseases of the nervous system
G31	Other degenerative diseases of nervous system, not elsewhere classified	G	Diseases of the nervous system
G35	Multiple sclerosis	G	Diseases of the nervous system
G36	Other acute disseminated demyelination	G	Diseases of the nervous system
G37	Other demyelinating diseases of central nervous system	G	Diseases of the nervous system
G40	Epilepsy	G	Diseases of the nervous system
G41	Status epilepticus	G	Diseases of the nervous system
G43	Migraine	G	Diseases of the nervous system
G44	Other headache syndromes	G	Diseases of the nervous system
G45	Transient cerebral ischaemic attacks and related syndromes	G	Diseases of the nervous system
G46	Vascular syndromes of brain in cerebrovascular diseases	G	Diseases of the nervous system
G47	Sleep disorders	G	Diseases of the nervous system
G50	Disorders of trigeminal nerve	G	Diseases of the nervous system
G51	Facial nerve disorders	G	Diseases of the nervous system
G52	Disorders of other cranial nerves	G	Diseases of the nervous system
G53	Cranial nerve disorders in diseases classified elsewhere	G	Diseases of the nervous system
G54	Nerve root and plexus disorders	G	Diseases of the nervous system
G55	Nerve root and plexus compressions in diseases classified elsewhere	G	Diseases of the nervous system
G56	Mononeuropathies of upper limb	G	Diseases of the nervous system
G57	Mononeuropathies of lower limb	G	Diseases of the nervous system
G58	Other mononeuropathies	G	Diseases of the nervous system
G59	Mononeuropathy in diseases classified elsewhere	G	Diseases of the nervous system
G60	Hereditary and idiopathic neuropathy	G	Diseases of the nervous system
G61	Inflammatory polyneuropathy	G	Diseases of the nervous system
G62	Other polyneuropathies	G	Diseases of the nervous system
G63	Polyneuropathy in diseases classified elsewhere	G	Diseases of the nervous system
G64	Other disorders of peripheral nervous system	G	Diseases of the nervous system
G70	Myasthenia gravis and other myoneural disorders	G	Diseases of the nervous system
G71	Primary disorders of muscles	G	Diseases of the nervous system
G72	Other myopathies	G	Diseases of the nervous system
G73	Disorders of myoneural junction and muscle in diseases classified elsewhere	G	Diseases of the nervous system
G80	Cerebral palsy	G	Diseases of the nervous system
G81	Hemiplegia	G	Diseases of the nervous system
G82	Paraplegia and tetraplegia	G	Diseases of the nervous system
G83	Other paralytic syndromes	G	Diseases of the nervous system
G90	Disorders of autonomic nervous system	G	Diseases of the nervous system
G91	Hydrocephalus	G	Diseases of the nervous system
G92	Toxic encephalopathy	G	Diseases of the nervous system
G93	Other disorders of brain	G	Diseases of the nervous system
G95	Other diseases of spinal cord	G	Diseases of the nervous system
G96	Other disorders of central nervous system	G	Diseases of the nervous system
G97	Postprocedural disorders of nervous system, not elsewhere classified	G	Diseases of the nervous system
G98	Other disorders of nervous system, not elsewhere classified	G	Diseases of the nervous system
H00	Hordeolum and chalazion	H	Diseases of the eye and adnexa
H01	Other inflammation of eyelid	H	Diseases of the eye and adnexa
H02	Other disorders of eyelid	H	Diseases of the eye and adnexa
H04	Disorders of lacrimal system	H	Diseases of the eye and adnexa
H05	Disorders of orbit	H	Diseases of the eye and adnexa
H06	Disorders of lacrimal system and orbit in diseases classified elsewhere	H	Diseases of the eye and adnexa
H10	Conjunctivitis	H	Diseases of the eye and adnexa
H11	Other disorders of conjunctiva	H	Diseases of the eye and adnexa
H15	Disorders of sclera	H	Diseases of the eye and adnexa
H16	Keratitis	H	Diseases of the eye and adnexa
H17	Corneal scars and opacities	H	Diseases of the eye and adnexa
H18	Other disorders of cornea	H	Diseases of the eye and adnexa
H19	Disorders of sclera and cornea in diseases classified elsewhere	H	Diseases of the eye and adnexa
H20	Iridocyclitis	H	Diseases of the eye and adnexa
H21	Other disorders of iris and ciliary body	H	Diseases of the eye and adnexa
H25	Senile cataract	H	Diseases of the eye and adnexa
H26	Other cataract	H	Diseases of the eye and adnexa
H27	Other disorders of lens	H	Diseases of the eye and adnexa
H30	Chorioretinal inflammation	H	Diseases of the eye and adnexa
H31	Other disorders of choroid	H	Diseases of the eye and adnexa
H33	Retinal detachments and breaks	H	Diseases of the eye and adnexa
H34	Retinal vascular occlusions	H	Diseases of the eye and adnexa
H35	Other retinal disorders	H	Diseases of the eye and adnexa
H36	Retinal disorders in diseases classified elsewhere	H	Diseases of the eye and adnexa
H40	Glaucoma	H	Diseases of the eye and adnexa
H43	Disorders of vitreous body	H	Diseases of the eye and adnexa
H44	Disorders of globe	H	Diseases of the eye and adnexa
H46	Optic neuritis	H	Diseases of the eye and adnexa
H47	Other disorders of optic [2nd] nerve and visual pathways	H	Diseases of the eye and adnexa
H48	Disorders of optic [2nd] nerve and visual pathways in diseases classified elsewhere	H	Diseases of the eye and adnexa
H49	Paralytic strabismus	H	Diseases of the eye and adnexa
H50	Other strabismus	H	Diseases of the eye and adnexa
H51	Other disorders of binocular movement	H	Diseases of the eye and adnexa
H52	Disorders of refraction and accommodation	H	Diseases of the eye and adnexa
H53	Visual disturbances	H	Diseases of the eye and adnexa
H54	Visual impairment including blindness (binocular or monocular)	H	Diseases of the eye and adnexa
H55	Nystagmus and other irregular eye movements	H	Diseases of the eye and adnexa
H57	Other disorders of eye and adnexa	H	Diseases of the eye and adnexa
H58	Other disorders of eye and adnexa in diseases classified elsewhere	H	Diseases of the eye and adnexa
H59	Postprocedural disorders of eye and adnexa, not elsewhere classified	H	Diseases of the eye and adnexa
H60	Otitis externa	H	Diseases of the ear and mastoid process
H61	Other disorders of external ear	H	Diseases of the ear and mastoid process
H62	Disorders of external ear in diseases classified elsewhere	H	Diseases of the ear and mastoid process
H65	Nonsuppurative otitis media	H	Diseases of the ear and mastoid process
H66	Suppurative and unspecified otitis media	H	Diseases of the ear and mastoid process
H68	Eustachian salpingitis and obstruction	H	Diseases of the ear and mastoid process
H69	Other disorders of Eustachian tube	H	Diseases of the ear and mastoid process
H70	Mastoiditis and related conditions	H	Diseases of the ear and mastoid process
H71	Cholesteatoma of middle ear	H	Diseases of the ear and mastoid process
H72	Perforation of tympanic membrane	H	Diseases of the ear and mastoid process
H73	Other disorders of tympanic membrane	H	Diseases of the ear and mastoid process
H74	Other disorders of middle ear and mastoid	H	Diseases of the ear and mastoid process
H80	Otosclerosis	H	Diseases of the ear and mastoid process
H81	Disorders of vestibular function	H	Diseases of the ear and mastoid process
H83	Other diseases of inner ear	H	Diseases of the ear and mastoid process
H90	Conductive and sensorineural hearing loss	H	Diseases of the ear and mastoid process
H91	Other hearing loss	H	Diseases of the ear and mastoid process
H92	Otalgia and effusion of ear	H	Diseases of the ear and mastoid process
H93	Other disorders of ear, not elsewhere classified	H	Diseases of the ear and mastoid process
H95	Postprocedural disorders of ear and mastoid process, not elsewhere classified	H	Diseases of the ear and mastoid process
I00	Rheumatic fever without mention of heart involvement	I	Diseases of the circulatory system
I01	Rheumatic fever with heart involvement	I	Diseases of the circulatory system
I05	Rheumatic mitral valve diseases	I	Diseases of the circulatory system
I06	Rheumatic aortic valve diseases	I	Diseases of the circulatory system
I07	Rheumatic tricuspid valve diseases	I	Diseases of the circulatory system
I08	Multiple valve diseases	I	Diseases of the circulatory system
I09	Other rheumatic heart diseases	I	Diseases of the circulatory system
I10	Essential (primary) hypertension	I	Diseases of the circulatory system
I11	Hypertensive heart disease	I	Diseases of the circulatory system
I12	Hypertensive renal disease	I	Diseases of the circulatory system
I13	Hypertensive heart and renal disease	I	Diseases of the circulatory system
I15	Secondary hypertension	I	Diseases of the circulatory system
I20	Angina pectoris	I	Diseases of the circulatory system
I21	Acute myocardial infarction	I	Diseases of the circulatory system
I23	Certain current complications following acute myocardial infarction	I	Diseases of the circulatory system
I24	Other acute ischaemic heart diseases	I	Diseases of the circulatory system
I25	Chronic ischaemic heart disease	I	Diseases of the circulatory system
I26	Pulmonary embolism	I	Diseases of the circulatory system
I27	Other pulmonary heart diseases	I	Diseases of the circulatory system
I28	Other diseases of pulmonary vessels	I	Diseases of the circulatory system
I30	Acute pericarditis	I	Diseases of the circulatory system
I31	Other diseases of pericardium	I	Diseases of the circulatory system
I33	Acute and subacute endocarditis	I	Diseases of the circulatory system
I34	Nonrheumatic mitral valve disorders	I	Diseases of the circulatory system
I35	Nonrheumatic aortic valve disorders	I	Diseases of the circulatory system
I36	Nonrheumatic tricuspid valve disorders	I	Diseases of the circulatory system
I37	Pulmonary valve disorders	I	Diseases of the circulatory system
I38	Endocarditis, valve unspecified	I	Diseases of the circulatory system
I40	Acute myocarditis	I	Diseases of the circulatory system
I42	Cardiomyopathy	I	Diseases of the circulatory system
I44	Atrioventricular and left bundle-branch block	I	Diseases of the circulatory system
I45	Other conduction disorders	I	Diseases of the circulatory system
I46	Cardiac arrest	I	Diseases of the circulatory system
I47	Paroxysmal tachycardia	I	Diseases of the circulatory system
I48	Atrial fibrillation and flutter	I	Diseases of the circulatory system
I49	Other cardiac arrhythmias	I	Diseases of the circulatory system
I50	Heart failure	I	Diseases of the circulatory system
I51	Complications and ill-defined descriptions of heart disease	I	Diseases of the circulatory system
I60	Subarachnoid haemorrhage	I	Diseases of the circulatory system
I61	Intracerebral haemorrhage	I	Diseases of the circulatory system
I62	Other nontraumatic intracranial haemorrhage	I	Diseases of the circulatory system
I63	Cerebral infarction	I	Diseases of the circulatory system
I64	Stroke, not specified as haemorrhage or infarction	I	Diseases of the circulatory system
I65	Occlusion and stenosis of precerebral arteries, not resulting in cerebral infarction	I	Diseases of the circulatory system
I66	Occlusion and stenosis of cerebral arteries, not resulting in cerebral infarction	I	Diseases of the circulatory system
I67	Other cerebrovascular diseases	I	Diseases of the circulatory system
I68	Cerebrovascular disorders in diseases classified elsewhere	I	Diseases of the circulatory system
I69	Sequelae of cerebrovascular disease	I	Diseases of the circulatory system
I70	Atherosclerosis	I	Diseases of the circulatory system
I71	Aortic aneurysm and dissection	I	Diseases of the circulatory system
I72	Other aneurysm and dissection	I	Diseases of the circulatory system
I73	Other peripheral vascular diseases	I	Diseases of the circulatory system
I74	Arterial embolism and thrombosis	I	Diseases of the circulatory system
I77	Other disorders of arteries and arterioles	I	Diseases of the circulatory system
I78	Diseases of capillaries	I	Diseases of the circulatory system
I79	Disorders of arteries, arterioles and capillaries in diseases classified elsewhere	I	Diseases of the circulatory system
I80	Phlebitis and thrombophlebitis	I	Diseases of the circulatory system
I81	Portal vein thrombosis	I	Diseases of the circulatory system
I82	Other venous embolism and thrombosis	I	Diseases of the circulatory system
I83	Varicose veins of lower extremities	I	Diseases of the circulatory system
I84	Haemorrhoids	I	Diseases of the circulatory system
I85	Oesophageal varices	I	Diseases of the circulatory system
I86	Varicose veins of other sites	I	Diseases of the circulatory system
I87	Other disorders of veins	I	Diseases of the circulatory system
I88	Nonspecific lymphadenitis	I	Diseases of the circulatory system
I89	Other noninfective disorders of lymphatic vessels and lymph nodes	I	Diseases of the circulatory system
I95	Hypotension	I	Diseases of the circulatory system
I97	Postprocedural disorders of circulatory system, not elsewhere classified	I	Diseases of the circulatory system
I98	Other disorders of circulatory system in diseases classified elsewhere	I	Diseases of the circulatory system
I99	Other and unspecified disorders of circulatory system	I	Diseases of the circulatory system
J00	Acute nasopharyngitis [common cold]	J	Diseases of the respiratory system
J01	Acute sinusitis	J	Diseases of the respiratory system
J02	Acute pharyngitis	J	Diseases of the respiratory system
J03	Acute tonsillitis	J	Diseases of the respiratory system
J04	Acute laryngitis and tracheitis	J	Diseases of the respiratory system
J05	Acute obstructive laryngitis [croup] and epiglottitis	J	Diseases of the respiratory system
J06	Acute upper respiratory infections of multiple and unspecified sites	J	Diseases of the respiratory system
J09	Influenza due to identified zoonotic or pandemic influenza virus	J	Diseases of the respiratory system
J10	Influenza due to identified seasonal influenza virus	J	Diseases of the respiratory system
J11	Influenza, virus not identified	J	Diseases of the respiratory system
J12	Viral pneumonia, not elsewhere classified	J	Diseases of the respiratory system
J13	Pneumonia due to Streptococcus pneumoniae	J	Diseases of the respiratory system
J14	Pneumonia due to Haemophilus influenzae	J	Diseases of the respiratory system
J15	Bacterial pneumonia, not elsewhere classified	J	Diseases of the respiratory system
J16	Pneumonia due to other infectious organisms, not elsewhere classified	J	Diseases of the respiratory system
J17	Pneumonia in diseases classified elsewhere	J	Diseases of the respiratory system
J18	Pneumonia, organism unspecified	J	Diseases of the respiratory system
J20	Acute bronchitis	J	Diseases of the respiratory system
J21	Acute bronchiolitis	J	Diseases of the respiratory system
J22	Unspecified acute lower respiratory infection	J	Diseases of the respiratory system
J30	Vasomotor and allergic rhinitis	J	Diseases of the respiratory system
J31	Chronic rhinitis, nasopharyngitis and pharyngitis	J	Diseases of the respiratory system
J32	Chronic sinusitis	J	Diseases of the respiratory system
J33	Nasal polyp	J	Diseases of the respiratory system
J34	Other disorders of nose and nasal sinuses	J	Diseases of the respiratory system
J35	Chronic diseases of tonsils and adenoids	J	Diseases of the respiratory system
J36	Peritonsillar abscess	J	Diseases of the respiratory system
J37	Chronic laryngitis and laryngotracheitis	J	Diseases of the respiratory system
J38	Diseases of vocal cords and larynx, not elsewhere classified	J	Diseases of the respiratory system
J39	Other diseases of upper respiratory tract	J	Diseases of the respiratory system
J40	Bronchitis, not specified as acute or chronic	J	Diseases of the respiratory system
J41	Simple and mucopurulent chronic bronchitis	J	Diseases of the respiratory system
J42	Unspecified chronic bronchitis	J	Diseases of the respiratory system
J43	Emphysema	J	Diseases of the respiratory system
J44	Other chronic obstructive pulmonary disease	J	Diseases of the respiratory system
J45	Asthma	J	Diseases of the respiratory system
J46	Status asthmaticus	J	Diseases of the respiratory system
J47	Bronchiectasis	J	Diseases of the respiratory system
J60	Coalworker pneumoconiosis	J	Diseases of the respiratory system
J61	Pneumoconiosis due to asbestos and other mineral fibres	J	Diseases of the respiratory system
J62	Pneumoconiosis due to dust containing silica	J	Diseases of the respiratory system
J63	Pneumoconiosis due to other inorganic dusts	J	Diseases of the respiratory system
J64	Unspecified pneumoconiosis	J	Diseases of the respiratory system
J65	Pneumoconiosis associated with tuberculosis	J	Diseases of the respiratory system
J66	Airway disease due to specific organic dust	J	Diseases of the respiratory system
J67	Hypersensitivity pneumonitis due to organic dust	J	Diseases of the respiratory system
J68	Respiratory conditions due to inhalation of chemicals, gases, fumes and vapours	J	Diseases of the respiratory system
J69	Pneumonitis due to solids and liquids	J	Diseases of the respiratory system
J70	Respiratory conditions due to other external agents	J	Diseases of the respiratory system
J80	Adult respiratory distress syndrome	J	Diseases of the respiratory system
J81	Pulmonary oedema	J	Diseases of the respiratory system
J82	Pulmonary eosinophilia, not elsewhere classified	J	Diseases of the respiratory system
J84	Other interstitial pulmonary diseases	J	Diseases of the respiratory system
J85	Abscess of lung and mediastinum	J	Diseases of the respiratory system
J86	Pyothorax	J	Diseases of the respiratory system
J90	Pleural effusion, not elsewhere classified	J	Diseases of the respiratory system
J92	Pleural plaque	J	Diseases of the respiratory system
J93	Pneumothorax	J	Diseases of the respiratory system
J94	Other pleural conditions	J	Diseases of the respiratory system
J95	Postprocedural respiratory disorders, not elsewhere classified	J	Diseases of the respiratory system
J96	Respiratory failure, not elsewhere classified	J	Diseases of the respiratory system
J98	Other respiratory disorders	J	Diseases of the respiratory system
K00	Disorders of tooth development and eruption	K	Diseases of the digestive system
K01	Embedded and impacted teeth	K	Diseases of the digestive system
K02	Dental caries	K	Diseases of the digestive system
K03	Other diseases of hard tissues of teeth	K	Diseases of the digestive system
K04	Diseases of pulp and periapical tissues	K	Diseases of the digestive system
K05	Gingivitis and periodontal diseases	K	Diseases of the digestive system
K06	Other disorders of gingiva and edentulous alveolar ridge	K	Diseases of the digestive system
K07	Dentofacial anomalies [including malocclusion]	K	Diseases of the digestive system
K08	Other disorders of teeth and supporting structures	K	Diseases of the digestive system
K09	Cysts of oral region, not elsewhere classified	K	Diseases of the digestive system
K10	Other diseases of jaws	K	Diseases of the digestive system
K11	Diseases of salivary glands	K	Diseases of the digestive system
K12	Stomatitis and related lesions	K	Diseases of the digestive system
K13	Other diseases of lip and oral mucosa	K	Diseases of the digestive system
K14	Diseases of tongue	K	Diseases of the digestive system
K20	Oesophagitis	K	Diseases of the digestive system
K21	Gastro-oesophageal reflux disease	K	Diseases of the digestive system
K22	Other diseases of oesophagus	K	Diseases of the digestive system
K25	Gastric ulcer	K	Diseases of the digestive system
K26	Duodenal ulcer	K	Diseases of the digestive system
K27	Peptic ulcer, site unspecified	K	Diseases of the digestive system
K28	Gastrojejunal ulcer	K	Diseases of the digestive system
K29	Gastritis and duodenitis	K	Diseases of the digestive system
K30	Functional dyspepsia	K	Diseases of the digestive system
K31	Other diseases of stomach and duodenum	K	Diseases of the digestive system
K35	Acute appendicitis	K	Diseases of the digestive system
K36	Other appendicitis	K	Diseases of the digestive system
K37	Unspecified appendicitis	K	Diseases of the digestive system
K38	Other diseases of appendix	K	Diseases of the digestive system
K40	Inguinal hernia	K	Diseases of the digestive system
K41	Femoral hernia	K	Diseases of the digestive system
K42	Umbilical hernia	K	Diseases of the digestive system
K43	Ventral hernia	K	Diseases of the digestive system
K44	Diaphragmatic hernia	K	Diseases of the digestive system
K45	Other abdominal hernia	K	Diseases of the digestive system
K46	Unspecified abdominal hernia	K	Diseases of the digestive system
K50	Crohn disease [regional enteritis]	K	Diseases of the digestive system
K51	Ulcerative colitis	K	Diseases of the digestive system
K52	Other noninfective gastroenteritis and colitis	K	Diseases of the digestive system
K55	Vascular disorders of intestine	K	Diseases of the digestive system
K56	Paralytic ileus and intestinal obstruction without hernia	K	Diseases of the digestive system
K57	Diverticular disease of intestine	K	Diseases of the digestive system
K58	Irritable bowel syndrome	K	Diseases of the digestive system
K59	Other functional intestinal disorders	K	Diseases of the digestive system
K60	Fissure and fistula of anal and rectal regions	K	Diseases of the digestive system
K61	Abscess of anal and rectal regions	K	Diseases of the digestive system
K62	Other diseases of anus and rectum	K	Diseases of the digestive system
K63	Other diseases of intestine	K	Diseases of the digestive system
K65	Peritonitis	K	Diseases of the digestive system
K66	Other disorders of peritoneum	K	Diseases of the digestive system
K67	Disorders of peritoneum in infectious diseases classified elsewhere	K	Diseases of the digestive system
K70	Alcoholic liver disease	K	Diseases of the digestive system
K71	Toxic liver disease	K	Diseases of the digestive system
K72	Hepatic failure, not elsewhere classified	K	Diseases of the digestive system
K73	Chronic hepatitis, not elsewhere classified	K	Diseases of the digestive system
K74	Fibrosis and cirrhosis of liver	K	Diseases of the digestive system
K75	Other inflammatory liver diseases	K	Diseases of the digestive system
K76	Other diseases of liver	K	Diseases of the digestive system
K77	Liver disorders in diseases classified elsewhere	K	Diseases of the digestive system
K80	Cholelithiasis	K	Diseases of the digestive system
K81	Cholecystitis	K	Diseases of the digestive system
K82	Other diseases of gallbladder	K	Diseases of the digestive system
K83	Other diseases of biliary tract	K	Diseases of the digestive system
K85	Acute pancreatitis	K	Diseases of the digestive system
K86	Other diseases of pancreas	K	Diseases of the digestive system
K90	Intestinal malabsorption	K	Diseases of the digestive system
K91	Postprocedural disorders of digestive system, not elsewhere classified	K	Diseases of the digestive system
K92	Other diseases of digestive system	K	Diseases of the digestive system
K93	Disorders of other digestive organs in diseases classified elsewhere	K	Diseases of the digestive system
L00	Staphylococcal scalded skin syndrome	L	Diseases of the skin and subcutaneous tissue
L01	Impetigo	L	Diseases of the skin and subcutaneous tissue
L02	Cutaneous abscess, furuncle and carbuncle	L	Diseases of the skin and subcutaneous tissue
L03	Cellulitis	L	Diseases of the skin and subcutaneous tissue
L04	Acute lymphadenitis	L	Diseases of the skin and subcutaneous tissue
L05	Pilonidal cyst	L	Diseases of the skin and subcutaneous tissue
L08	Other local infections of skin and subcutaneous tissue	L	Diseases of the skin and subcutaneous tissue
L10	Pemphigus	L	Diseases of the skin and subcutaneous tissue
L11	Other acantholytic disorders	L	Diseases of the skin and subcutaneous tissue
L12	Pemphigoid	L	Diseases of the skin and subcutaneous tissue
L13	Other bullous disorders	L	Diseases of the skin and subcutaneous tissue
L20	Atopic dermatitis	L	Diseases of the skin and subcutaneous tissue
L21	Seborrhoeic dermatitis	L	Diseases of the skin and subcutaneous tissue
L22	Diaper [napkin] dermatitis	L	Diseases of the skin and subcutaneous tissue
L23	Allergic contact dermatitis	L	Diseases of the skin and subcutaneous tissue
L24	Irritant contact dermatitis	L	Diseases of the skin and subcutaneous tissue
L25	Unspecified contact dermatitis	L	Diseases of the skin and subcutaneous tissue
L26	Exfoliative dermatitis	L	Diseases of the skin and subcutaneous tissue
L27	Dermatitis due to substances taken internally	L	Diseases of the skin and subcutaneous tissue
L28	Lichen simplex chronicus and prurigo	L	Diseases of the skin and subcutaneous tissue
L29	Pruritus	L	Diseases of the skin and subcutaneous tissue
L30	Other dermatitis	L	Diseases of the skin and subcutaneous tissue
L40	Psoriasis	L	Diseases of the skin and subcutaneous tissue
L41	Parapsoriasis	L	Diseases of the skin and subcutaneous tissue
L42	Pityriasis rosea	L	Diseases of the skin and subcutaneous tissue
L43	Lichen planus	L	Diseases of the skin and subcutaneous tissue
L44	Other papulosquamous disorders	L	Diseases of the skin and subcutaneous tissue
L50	Urticaria	L	Diseases of the skin and subcutaneous tissue
L51	Erythema multiforme	L	Diseases of the skin and subcutaneous tissue
L52	Erythema nodosum	L	Diseases of the skin and subcutaneous tissue
L53	Other erythematous conditions	L	Diseases of the skin and subcutaneous tissue
L55	Sunburn	L	Diseases of the skin and subcutaneous tissue
L56	Other acute skin changes due to ultraviolet radiation	L	Diseases of the skin and subcutaneous tissue
L57	Skin changes due to chronic exposure to nonionizing radiation	L	Diseases of the skin and subcutaneous tissue
L58	Radiodermatitis	L	Diseases of the skin and subcutaneous tissue
L59	Other disorders of skin and subcutaneous tissue related to radiation	L	Diseases of the skin and subcutaneous tissue
L60	Nail disorders	L	Diseases of the skin and subcutaneous tissue
L63	Alopecia areata	L	Diseases of the skin and subcutaneous tissue
L64	Androgenic alopecia	L	Diseases of the skin and subcutaneous tissue
L65	Other nonscarring hair loss	L	Diseases of the skin and subcutaneous tissue
L66	Cicatricial alopecia [scarring hair loss]	L	Diseases of the skin and subcutaneous tissue
L67	Hair colour and hair shaft abnormalities	L	Diseases of the skin and subcutaneous tissue
L68	Hypertrichosis	L	Diseases of the skin and subcutaneous tissue
L70	Acne	L	Diseases of the skin and subcutaneous tissue
L71	Rosacea	L	Diseases of the skin and subcutaneous tissue
L72	Follicular cysts of skin and subcutaneous tissue	L	Diseases of the skin and subcutaneous tissue
L73	Other follicular disorders	L	Diseases of the skin and subcutaneous tissue
L74	Eccrine sweat disorders	L	Diseases of the skin and subcutaneous tissue
L75	Apocrine sweat disorders	L	Diseases of the skin and subcutaneous tissue
L80	Vitiligo	L	Diseases of the skin and subcutaneous tissue
L81	Other disorders of pigmentation	L	Diseases of the skin and subcutaneous tissue
L82	Seborrhoeic keratosis	L	Diseases of the skin and subcutaneous tissue
L83	Acanthosis nigricans	L	Diseases of the skin and subcutaneous tissue
L84	Corns and callosities	L	Diseases of the skin and subcutaneous tissue
L85	Other epidermal thickening	L	Diseases of the skin and subcutaneous tissue
L87	Transepidermal elimination disorders	L	Diseases of the skin and subcutaneous tissue
L88	Pyoderma gangrenosum	L	Diseases of the skin and subcutaneous tissue
L89	Decubitus ulcer and pressure area	L	Diseases of the skin and subcutaneous tissue
L90	Atrophic disorders of skin	L	Diseases of the skin and subcutaneous tissue
L91	Hypertrophic disorders of skin	L	Diseases of the skin and subcutaneous tissue
L92	Granulomatous disorders of skin and subcutaneous tissue	L	Diseases of the skin and subcutaneous tissue
L93	Lupus erythematosus	L	Diseases of the skin and subcutaneous tissue
L94	Other localized connective tissue disorders	L	Diseases of the skin and subcutaneous tissue
L95	Vasculitis limited to skin, not elsewhere classified	L	Diseases of the skin and subcutaneous tissue
L97	Ulcer of lower limb, not elsewhere classified	L	Diseases of the skin and subcutaneous tissue
L98	Other disorders of skin and subcutaneous tissue, not elsewhere classified	L	Diseases of the skin and subcutaneous tissue
L99	Other disorders of skin and subcutaneous tissue in diseases classified elsewhere	L	Diseases of the skin and subcutaneous tissue
M00	Pyogenic arthritis	M	Diseases of the musculoskeletal system and connective tissue
M01	Direct infections of joint in infectious and parasitic diseases classified elsewhere	M	Diseases of the musculoskeletal system and connective tissue
M02	Reactive arthropathies	M	Diseases of the musculoskeletal system and connective tissue
M05	Seropositive rheumatoid arthritis	M	Diseases of the musculoskeletal system and connective tissue
M06	Other rheumatoid arthritis	M	Diseases of the musculoskeletal system and connective tissue
M07	Psoriatic and enteropathic arthropathies	M	Diseases of the musculoskeletal system and connective tissue
M08	Juvenile arthritis	M	Diseases of the musculoskeletal system and connective tissue
M10	Gout	M	Diseases of the musculoskeletal system and connective tissue
M11	Other crystal arthropathies	M	Diseases of the musculoskeletal system and connective tissue
M12	Other specific arthropathies	M	Diseases of the musculoskeletal system and connective tissue
M13	Other arthritis	M	Diseases of the musculoskeletal system and connective tissue
M14	Arthropathies in other diseases classified elsewhere	M	Diseases of the musculoskeletal system and connective tissue
M15	Polyarthrosis	M	Diseases of the musculoskeletal system and connective tissue
M16	Coxarthrosis [arthrosis of hip]	M	Diseases of the musculoskeletal system and connective tissue
M17	Gonarthrosis [arthrosis of knee]	M	Diseases of the musculoskeletal system and connective tissue
M18	Arthrosis of first carpometacarpal joint	M	Diseases of the musculoskeletal system and connective tissue
M19	Other arthrosis	M	Diseases of the musculoskeletal system and connective tissue
M20	Acquired deformities of fingers and toes	M	Diseases of the musculoskeletal system and connective tissue
M21	Other acquired deformities of limbs	M	Diseases of the musculoskeletal system and connective tissue
M22	Disorders of patella	M	Diseases of the musculoskeletal system and connective tissue
M23	Internal derangement of knee	M	Diseases of the musculoskeletal system and connective tissue
M24	Other specific joint derangements	M	Diseases of the musculoskeletal system and connective tissue
M25	Other joint disorders, not elsewhere classified	M	Diseases of the musculoskeletal system and connective tissue
M30	Polyarteritis nodosa and related conditions	M	Diseases of the musculoskeletal system and connective tissue
M31	Other necrotizing vasculopathies	M	Diseases of the musculoskeletal system and connective tissue
M32	Systemic lupus erythematosus	M	Diseases of the musculoskeletal system and connective tissue
M33	Dermatopolymyositis	M	Diseases of the musculoskeletal system and connective tissue
M34	Systemic sclerosis	M	Diseases of the musculoskeletal system and connective tissue
M35	Other systemic involvement of connective tissue	M	Diseases of the musculoskeletal system and connective tissue
M36	Systemic disorders of connective tissue in diseases classified elsewhere	M	Diseases of the musculoskeletal system and connective tissue
M40	Kyphosis and lordosis	M	Diseases of the musculoskeletal system and connective tissue
M41	Scoliosis	M	Diseases of the musculoskeletal system and connective tissue
M42	Spinal osteochondrosis	M	Diseases of the musculoskeletal system and connective tissue
M43	Other deforming dorsopathies	M	Diseases of the musculoskeletal system and connective tissue
M45	Ankylosing spondylitis	M	Diseases of the musculoskeletal system and connective tissue
M46	Other inflammatory spondylopathies	M	Diseases of the musculoskeletal system and connective tissue
M47	Spondylosis	M	Diseases of the musculoskeletal system and connective tissue
M48	Other spondylopathies	M	Diseases of the musculoskeletal system and connective tissue
M49	Spondylopathies in diseases classified elsewhere	M	Diseases of the musculoskeletal system and connective tissue
M50	Cervical disc disorders	M	Diseases of the musculoskeletal system and connective tissue
M51	Other intervertebral disc disorders	M	Diseases of the musculoskeletal system and connective tissue
M53	Other dorsopathies, not elsewhere classified	M	Diseases of the musculoskeletal system and connective tissue
M54	Dorsalgia	M	Diseases of the musculoskeletal system and connective tissue
M60	Myositis	M	Diseases of the musculoskeletal system and connective tissue
M61	Calcification and ossification of muscle	M	Diseases of the musculoskeletal system and connective tissue
M62	Other disorders of muscle	M	Diseases of the musculoskeletal system and connective tissue
M65	Synovitis and tenosynovitis	M	Diseases of the musculoskeletal system and connective tissue
M66	Spontaneous rupture of synovium and tendon	M	Diseases of the musculoskeletal system and connective tissue
M67	Other disorders of synovium and tendon	M	Diseases of the musculoskeletal system and connective tissue
M70	Soft tissue disorders related to use, overuse and pressure	M	Diseases of the musculoskeletal system and connective tissue
M71	Other bursopathies	M	Diseases of the musculoskeletal system and connective tissue
M72	Fibroblastic disorders	M	Diseases of the musculoskeletal system and connective tissue
M75	Shoulder lesions	M	Diseases of the musculoskeletal system and connective tissue
M76	Enthesopathies of lower limb, excluding foot	M	Diseases of the musculoskeletal system and connective tissue
M77	Other enthesopathies	M	Diseases of the musculoskeletal system and connective tissue
M79	Other soft tissue disorders, not elsewhere classified	M	Diseases of the musculoskeletal system and connective tissue
M80	Osteoporosis with pathological fracture	M	Diseases of the musculoskeletal system and connective tissue
M81	Osteoporosis without pathological fracture	M	Diseases of the musculoskeletal system and connective tissue
M82	Osteoporosis in diseases classified elsewhere	M	Diseases of the musculoskeletal system and connective tissue
M83	Adult osteomalacia	M	Diseases of the musculoskeletal system and connective tissue
M84	Disorders of continuity of bone	M	Diseases of the musculoskeletal system and connective tissue
M85	Other disorders of bone density and structure	M	Diseases of the musculoskeletal system and connective tissue
M86	Osteomyelitis	M	Diseases of the musculoskeletal system and connective tissue
M87	Osteonecrosis	M	Diseases of the musculoskeletal system and connective tissue
M88	Paget disease of bone [osteitis deformans]	M	Diseases of the musculoskeletal system and connective tissue
M89	Other disorders of bone	M	Diseases of the musculoskeletal system and connective tissue
M90	Osteopathies in diseases classified elsewhere	M	Diseases of the musculoskeletal system and connective tissue
M91	Juvenile osteochondrosis of hip and pelvis	M	Diseases of the musculoskeletal system and connective tissue
M92	Other juvenile osteochondrosis	M	Diseases of the musculoskeletal system and connective tissue
M93	Other osteochondropathies	M	Diseases of the musculoskeletal system and connective tissue
M94	Other disorders of cartilage	M	Diseases of the musculoskeletal system and connective tissue
M95	Other acquired deformities of musculoskeletal system and connective tissue	M	Diseases of the musculoskeletal system and connective tissue
M96	Postprocedural musculoskeletal disorders, not elsewhere classified	M	Diseases of the musculoskeletal system and connective tissue
M99	Biomechanical lesions, not elsewhere classified	M	Diseases of the musculoskeletal system and connective tissue
N00	Acute nephritic syndrome	N	Diseases of the genitourinary system
N01	Rapidly progressive nephritic syndrome	N	Diseases of the genitourinary system
N02	Recurrent and persistent haematuria	N	Diseases of the genitourinary system
N03	Chronic nephritic syndrome	N	Diseases of the genitourinary system
N04	Nephrotic syndrome	N	Diseases of the genitourinary system
N05	Unspecified nephritic syndrome	N	Diseases of the genitourinary system
N06	Isolated proteinuria with specified morphological lesion	N	Diseases of the genitourinary system
N07	Hereditary nephropathy, not elsewhere classified	N	Diseases of the genitourinary system
N08	Glomerular disorders in diseases classified elsewhere	N	Diseases of the genitourinary system
N10	Acute tubulo-interstitial nephritis	N	Diseases of the genitourinary system
N11	Chronic tubulo-interstitial nephritis	N	Diseases of the genitourinary system
N12	Tubulo-interstitial nephritis, not specified as acute or chronic	N	Diseases of the genitourinary system
N13	Obstructive and reflux uropathy	N	Diseases of the genitourinary system
N14	Drug- and heavy-metal-induced tubulo-interstitial and tubular conditions	N	Diseases of the genitourinary system
N15	Other renal tubulo-interstitial diseases	N	Diseases of the genitourinary system
N17	Acute renal failure	N	Diseases of the genitourinary system
N18	Chronic kidney disease	N	Diseases of the genitourinary system
N19	Unspecified kidney failure	N	Diseases of the genitourinary system
N20	Calculus of kidney and ureter	N	Diseases of the genitourinary system
N21	Calculus of lower urinary tract	N	Diseases of the genitourinary system
N23	Unspecified renal colic	N	Diseases of the genitourinary system
N25	Disorders resulting from impaired renal tubular function	N	Diseases of the genitourinary system
N26	Unspecified contracted kidney	N	Diseases of the genitourinary system
N27	Small kidney of unknown cause	N	Diseases of the genitourinary system
N28	Other disorders of kidney and ureter, not elsewhere classified	N	Diseases of the genitourinary system
N29	Other disorders of kidney and ureter in diseases classified elsewhere	N	Diseases of the genitourinary system
N30	Cystitis	N	Diseases of the genitourinary system
N31	Neuromuscular dysfunction of bladder, not elsewhere classified	N	Diseases of the genitourinary system
N32	Other disorders of bladder	N	Diseases of the genitourinary system
N34	Urethritis and urethral syndrome	N	Diseases of the genitourinary system
N35	Urethral stricture	N	Diseases of the genitourinary system
N36	Other disorders of urethra	N	Diseases of the genitourinary system
N39	Other disorders of urinary system	N	Diseases of the genitourinary system
N60	Benign mammary dysplasia	N	Diseases of the genitourinary system
N61	Inflammatory disorders of breast	N	Diseases of the genitourinary system
N62	Hypertrophy of breast	N	Diseases of the genitourinary system
N63	Unspecified lump in breast	N	Diseases of the genitourinary system
N64	Other disorders of breast	N	Diseases of the genitourinary system
N70	Salpingitis and oophoritis	N	Diseases of the genitourinary system
N71	Inflammatory disease of uterus, except cervix	N	Diseases of the genitourinary system
N72	Inflammatory disease of cervix uteri	N	Diseases of the genitourinary system
N73	Other female pelvic inflammatory diseases	N	Diseases of the genitourinary system
N74	Female pelvic inflammatory disorders in diseases classified elsewhere	N	Diseases of the genitourinary system
N75	Diseases of Bartholin gland	N	Diseases of the genitourinary system
N76	Other inflammation of vagina and vulva	N	Diseases of the genitourinary system
N77	Vulvovaginal ulceration and inflammation in diseases classified elsewhere	N	Diseases of the genitourinary system
N80	Endometriosis	N	Diseases of the genitourinary system
N81	Female genital prolapse	N	Diseases of the genitourinary system
N82	Fistulae involving female genital tract	N	Diseases of the genitourinary system
N83	Noninflammatory disorders of ovary, fallopian tube and broad ligament	N	Diseases of the genitourinary system
N84	Polyp of female genital tract	N	Diseases of the genitourinary system
N85	Other noninflammatory disorders of uterus, except cervix	N	Diseases of the genitourinary system
N86	Erosion and ectropion of cervix uteri	N	Diseases of the genitourinary system
N87	Dysplasia of cervix uteri	N	Diseases of the genitourinary system
N88	Other noninflammatory disorders of cervix uteri	N	Diseases of the genitourinary system
N89	Other noninflammatory disorders of vagina	N	Diseases of the genitourinary system
N90	Other noninflammatory disorders of vulva and perineum	N	Diseases of the genitourinary system
N91	Absent, scanty and rare menstruation	N	Diseases of the genitourinary system
N92	Excessive, frequent and irregular menstruation	N	Diseases of the genitourinary system
N93	Other abnormal uterine and vaginal bleeding	N	Diseases of the genitourinary system
N94	Pain and other conditions associated with female genital organs and menstrual cycle	N	Diseases of the genitourinary system
N95	Menopausal and other perimenopausal disorders	N	Diseases of the genitourinary system
N96	Habitual aborter	N	Diseases of the genitourinary system
N97	Female infertility	N	Diseases of the genitourinary system
N98	Complications associated with artificial fertilization	N	Diseases of the genitourinary system
N99	Postprocedural disorders of genitourinary system, not elsewhere classified	N	Diseases of the genitourinary system
O00	Ectopic pregnancy	O	Pregnancy, childbirth and the puerperium
O01	Hydatidiform mole	O	Pregnancy, childbirth and the puerperium
O02	Other abnormal products of conception	O	Pregnancy, childbirth and the puerperium
O03	Spontaneous abortion	O	Pregnancy, childbirth and the puerperium
O04	Medical abortion	O	Pregnancy, childbirth and the puerperium
O05	Other abortion	O	Pregnancy, childbirth and the puerperium
O06	Unspecified abortion	O	Pregnancy, childbirth and the puerperium
O07	Failed attempted abortion	O	Pregnancy, childbirth and the puerperium
O08	Complications following abortion and ectopic and molar pregnancy	O	Pregnancy, childbirth and the puerperium
O10	Pre-existing hypertension complicating pregnancy, childbirth and the puerperium	O	Pregnancy, childbirth and the puerperium
O11	Pre-eclampsia superimposed on chronic hypertension	O	Pregnancy, childbirth and the puerperium
O12	Gestational [pregnancy-induced] oedema and proteinuria without hypertension	O	Pregnancy, childbirth and the puerperium
O13	Gestational [pregnancy-induced] hypertension	O	Pregnancy, childbirth and the puerperium
O14	Pre-eclampsia	O	Pregnancy, childbirth and the puerperium
O15	Eclampsia	O	Pregnancy, childbirth and the puerperium
O16	Unspecified maternal hypertension	O	Pregnancy, childbirth and the puerperium
O20	Haemorrhage in early pregnancy	O	Pregnancy, childbirth and the puerperium
O21	Excessive vomiting in pregnancy	O	Pregnancy, childbirth and the puerperium
O22	Venous complications and haemorrhoids in pregnancy	O	Pregnancy, childbirth and the puerperium
O23	Infections of genitourinary tract in pregnancy	O	Pregnancy, childbirth and the puerperium
O24	Diabetes mellitus in pregnancy	O	Pregnancy, childbirth and the puerperium
O25	Malnutrition in pregnancy	O	Pregnancy, childbirth and the puerperium
O26	Maternal care for other conditions predominantly related to pregnancy	O	Pregnancy, childbirth and the puerperium
O28	Abnormal findings on antenatal screening of mother	O	Pregnancy, childbirth and the puerperium
O29	Complications of anaesthesia during pregnancy	O	Pregnancy, childbirth and the puerperium
S12	Fracture of neck	S-T	Injury, poisoning and certain other consequences of external causes
S22	Fracture of rib(s), sternum and thoracic spine	S-T	Injury, poisoning and certain other consequences of external causes
S32	Fracture of lumbar spine and pelvis	S-T	Injury, poisoning and certain other consequences of external causes
S42	Fracture of shoulder and upper arm	S-T	Injury, poisoning and certain other consequences of external causes
S52	Fracture of forearm	S-T	Injury, poisoning and certain other consequences of external causes
S62	Fracture at wrist and hand level	S-T	Injury, poisoning and certain other consequences of external causes
S72	Fracture of femur	S-T	Injury, poisoning and certain other consequences of external causes
S82	Fracture of lower leg, including ankle	S-T	Injury, poisoning and certain other consequences of external causes
S92	Fracture of foot, except ankle	S-T	Injury, poisoning and certain other consequences of external causes
T08	Fracture of spine, level unspecified	S-T	Injury, poisoning and certain other consequences of external causes
T10	Fracture of upper limb, level unspecified	S-T	Injury, poisoning and certain other consequences of external causes
T12	Fracture of lower limb, level unspecified	S-T	Injury, poisoning and certain other consequences of external causes
T92	Sequelae of injuries of upper limb	S-T	Injury, poisoning and certain other consequences of external causes
T93	Sequelae of injuries of lower limb	S-T	Injury, poisoning and certain other consequences of external causes
